# Supplementary material for: Comprehensive transcriptomic profiling reveals complex molecular mechanisms in the regulation of style-length dimorphism in Guettarda speciosa (Rubiaceae), a species with “anomalous” distyly
Source: Front Plant Sci. 2023 Mar 16;14:1116078. doi: 10.3389/fpls.2023.1116078 (PMC10060554; doi:10.3389/fpls.2023.1116078)
Supplement: Supplementary file 6 [file Table_1.xlsx]

## Sheet: Sheet1
#ID	Gene Family
Gt_45488	AGC_RSK-2
Gt_22704	AGC_RSK-2
Gt_45272	AGC_RSK-2
Gt_5197	AGC_RSK-2
Gt_7941	AGC_RSK-2
Gt_6719	AGC_RSK-2
Gt_79955	AGC_RSK-2
Gt_47027	AGC_RSK-2
Gt_11181	AP2/ERF-AP2
Gt_81708	AP2/ERF-ERF
Gt_15562	AP2/ERF-ERF
Gt_68222	AP2/ERF-ERF
Gt_22021	AP2/ERF-ERF
Gt_44834	AP2/ERF-ERF
Gt_35856	AP2/ERF-ERF
Gt_58813	AP2/ERF-ERF
Gt_4971	AP2/ERF-ERF
Gt_54540	AP2/ERF-ERF
Gt_77268	AP2/ERF-ERF
Gt_38860	AP2/ERF-ERF
Gt_78593	AP2/ERF-ERF
Gt_61749	AP2/ERF-ERF
Gt_21667	AP2/ERF-ERF
Gt_12979	AP2/ERF-RAV
Gt_47484	AUX/IAA
Gt_47672	AUX/IAA
Gt_65093	AUX/IAA
Gt_33696	AUX/IAA
Gt_65380	AUX/IAA
Gt_15651	AUX/IAA
Gt_80071	AUX/IAA
Gt_27457	AUX/IAA
Gt_31037	AUX/IAA
Gt_67932	B3
Gt_76680	B3
Gt_81711	B3
Gt_73459	B3
Gt_52730	B3-ARF
Gt_76431	B3-ARF
Gt_35484	B3-ARF
Gt_70868	B3-ARF
Gt_68037	B3-ARF
Gt_2747	B3-ARF
Gt_71969	B3-ARF
Gt_182	B3-ARF
Gt_30232	B3-ARF
Gt_139	B3-ARF
Gt_38158	BES1
Gt_44183	BES1
Gt_55801	BES1
Gt_59779	BES1
Gt_67476	BES1
Gt_53213	bHLH
Gt_73130	bHLH
Gt_45968	bHLH
Gt_64836	bHLH
Gt_18161	bHLH
Gt_29630	bHLH
Gt_35771	bHLH
Gt_6116	bHLH
Gt_17807	bHLH
Gt_20287	bHLH
Gt_10832	bHLH
Gt_41340	bHLH
Gt_17955	bHLH
Gt_81870	bHLH
Gt_76402	bZIP
Gt_14590	bZIP
Gt_49497	bZIP
Gt_59843	bZIP
Gt_34741	bZIP
Gt_13254	bZIP
Gt_42059	bZIP
Gt_46260	bZIP
Gt_31648	bZIP
Gt_47068	bZIP
Gt_64865	C2C2-Dof
Gt_82098	C2C2-Dof
Gt_63443	C2C2-Dof
Gt_544	C2C2-GATA
Gt_35662	C2C2-GATA
Gt_10995	C2C2-GATA
Gt_38375	C2C2-YABBY
Gt_56317	C2H2
Gt_25322	C2H2
Gt_15991	C2H2
Gt_57184	C2H2
Gt_28662	C2H2
Gt_32657	C2H2
Gt_5271	C2H2
Gt_5490	C2H2
Gt_47577	C2H2
Gt_67254	C2H2
Gt_49791	C3H
Gt_22651	CAMK_CAMKL-CHK1
Gt_42952	CAMK_CAMKL-CHK1
Gt_9384	CAMK_CAMKL-CHK1
Gt_46270	CAMK_CAMKL-CHK1
Gt_72339	CAMK_CAMKL-CHK1
Gt_51081	CAMK_CAMKL-CHK1
Gt_45060	CAMK_CDPK
Gt_34560	CAMK_CDPK
Gt_27056	CAMK_CDPK
Gt_64746	CAMK_CDPK
Gt_74800	CAMK_OST1L
Gt_30469	CAMTA
Gt_26110	CAMTA
Gt_48425	CAMTA
Gt_52617	CK1_CK1
Gt_74804	CK1_CK1
Gt_55741	CMGC_CDK-CRK7-CDK9
Gt_22549	CMGC_CDK-CRK7-CDK9
Gt_51884	CMGC_CK2
Gt_55093	CMGC_CK2
Gt_11883	CMGC_GSK
Gt_33921	CMGC_GSK
Gt_27413	CMGC_GSK
Gt_75268	CMGC_GSK
Gt_60363	CMGC_GSK
Gt_22507	CMGC_MAPK
Gt_26836	CPP
Gt_48767	CPP
Gt_37270	GARP-G2-like
Gt_41026	GARP-G2-like
Gt_12647	GNAT
Gt_58014	GRAS
Gt_20674	GRAS
Gt_26663	HB-HD-ZIP
Gt_55327	HB-HD-ZIP
Gt_62684	HB-HD-ZIP
Gt_3006	HB-HD-ZIP
Gt_73057	HB-HD-ZIP
Gt_2006	HB-HD-ZIP
Gt_14169	HB-HD-ZIP
Gt_33593	HB-HD-ZIP
Gt_47824	HB-KNOX
Gt_39066	HB-other
Gt_50901	HSF
Gt_69511	HSF
Gt_63465	IWS1
Gt_27093	Jumonji
Gt_57614	LOB
Gt_40062	LOB
Gt_14690	LOB
Gt_26434	LOB
Gt_63222	MADS-MIKC
Gt_31847	MADS-MIKC
Gt_50973	MADS-MIKC
Gt_22594	MADS-MIKC
Gt_38553	MADS-MIKC
Gt_16184	MADS-MIKC
Gt_45883	MADS-M-type
Gt_14124	MADS-M-type
Gt_29353	MADS-M-type
Gt_22839	MADS-M-type
Gt_82011	MADS-M-type
Gt_60552	MYB
Gt_69815	MYB
Gt_70655	MYB
Gt_35890	MYB
Gt_82249	MYB
Gt_62427	MYB
Gt_46996	MYB
Gt_46760	MYB-related
Gt_60393	MYB-related
Gt_11902	MYB-related
Gt_70458	MYB-related
Gt_28491	MYB-related
Gt_43509	NAC
Gt_27664	NAC
Gt_29575	NAC
Gt_14907	NAC
Gt_67211	NAC
Gt_59518	NAC
Gt_39888	NAC
Gt_70557	NAC
Gt_21070	NF-X1
Gt_30929	NF-YB
Gt_53007	NF-YC
Gt_79060	Others
Gt_29763	Others
Gt_25366	Others
Gt_66678	Others
Gt_62292	Others
Gt_39914	PHD
Gt_54584	PLATZ
Gt_41000	PLATZ
Gt_13759	PLATZ
Gt_76287	RLK-Pelle_CR4L
Gt_8093	RLK-Pelle_CR4L
Gt_53340	RLK-Pelle_CrRLK1L-1
Gt_1049	RLK-Pelle_CrRLK1L-1
Gt_77734	RLK-Pelle_DLSV
Gt_26852	RLK-Pelle_DLSV
Gt_50505	RLK-Pelle_DLSV
Gt_32395	RLK-Pelle_DLSV
Gt_27671	RLK-Pelle_DLSV
Gt_53365	RLK-Pelle_DLSV
Gt_81208	RLK-Pelle_DLSV
Gt_43914	RLK-Pelle_DLSV
Gt_640	RLK-Pelle_DLSV
Gt_60364	RLK-Pelle_DLSV
Gt_25001	RLK-Pelle_Extensin
Gt_79231	RLK-Pelle_L-LEC
Gt_67193	RLK-Pelle_L-LEC
Gt_74238	RLK-Pelle_LRK10L-2
Gt_60760	RLK-Pelle_LRR-II
Gt_69577	RLK-Pelle_LRR-II
Gt_4127	RLK-Pelle_LRR-II
Gt_57493	RLK-Pelle_LRR-III
Gt_48518	RLK-Pelle_LRR-III
Gt_24197	RLK-Pelle_LRR-III
Gt_3384	RLK-Pelle_LRR-III
Gt_4287	RLK-Pelle_LRR-III
Gt_59802	RLK-Pelle_LRR-III
Gt_66900	RLK-Pelle_LRR-III
Gt_20311	RLK-Pelle_LRR-III
Gt_31773	RLK-Pelle_LRR-III
Gt_5504	RLK-Pelle_LRR-III
Gt_4718	RLK-Pelle_LRR-III
Gt_3087	RLK-Pelle_LRR-III
Gt_68848	RLK-Pelle_LRR-III
Gt_80078	RLK-Pelle_LRR-III
Gt_70087	RLK-Pelle_LRR-IX
Gt_1616	RLK-Pelle_LRR-IX
Gt_1427	RLK-Pelle_LRR-IX
Gt_44414	RLK-Pelle_LRR-IX
Gt_32628	RLK-Pelle_LRR-IX
Gt_75401	RLK-Pelle_LRR-V
Gt_33264	RLK-Pelle_LRR-V
Gt_37036	RLK-Pelle_LRR-V
Gt_1489	RLK-Pelle_LRR-VI-1
Gt_52511	RLK-Pelle_LRR-VI-2
Gt_62559	RLK-Pelle_LRR-VI-2
Gt_26792	RLK-Pelle_LRR-VII-1
Gt_5653	RLK-Pelle_LRR-Xb-1
Gt_321	RLK-Pelle_LRR-Xb-1
Gt_221	RLK-Pelle_LRR-XI-1
Gt_30117	RLK-Pelle_LRR-XI-1
Gt_68067	RLK-Pelle_LRR-XI-1
Gt_1575	RLK-Pelle_LRR-XI-1
Gt_67872	RLK-Pelle_LRR-XI-1
Gt_42178	RLK-Pelle_LRR-XI-1
Gt_33331	RLK-Pelle_LRR-XI-1
Gt_69415	RLK-Pelle_LRR-XI-2
Gt_68469	RLK-Pelle_LRR-XII-1
Gt_1004	RLK-Pelle_LRR-XII-1
Gt_5460	RLK-Pelle_LRR-XIIIa
Gt_29147	RLK-Pelle_LRR-XIV
Gt_36020	RLK-Pelle_LRR-XIV
Gt_55449	RLK-Pelle_LysM
Gt_3455	RLK-Pelle_PERK-1
Gt_5980	RLK-Pelle_PERK-1
Gt_75008	RLK-Pelle_PERK-2
Gt_61416	RLK-Pelle_PERK-2
Gt_73603	RLK-Pelle_PERK-2
Gt_33906	RLK-Pelle_PERK-2
Gt_80815	RLK-Pelle_PERK-2
Gt_41553	RLK-Pelle_PERK-2
Gt_55044	RLK-Pelle_PERK-2
Gt_36617	RLK-Pelle_PERK-2
Gt_64442	RLK-Pelle_RLCK-IXb
Gt_34105	RLK-Pelle_RLCK-IXb
Gt_36724	RLK-Pelle_RLCK-IXb
Gt_59961	RLK-Pelle_RLCK-V
Gt_53860	RLK-Pelle_RLCK-V
Gt_2962	RLK-Pelle_RLCK-V
Gt_8155	RLK-Pelle_RLCK-V
Gt_42397	RLK-Pelle_RLCK-V
Gt_27151	RLK-Pelle_RLCK-VI
Gt_37015	RLK-Pelle_RLCK-VIIa-1
Gt_64830	RLK-Pelle_RLCK-VIIa-1
Gt_20218	RLK-Pelle_RLCK-VIIa-1
Gt_80718	RLK-Pelle_RLCK-VIIa-1
Gt_45384	RLK-Pelle_RLCK-VIIa-2
Gt_27354	RLK-Pelle_RLCK-VIIa-2
Gt_23299	RLK-Pelle_RLCK-VIIa-2
Gt_10282	RLK-Pelle_RLCK-VIIa-2
Gt_41988	RLK-Pelle_RLCK-VIIa-2
Gt_10085	RLK-Pelle_RLCK-VIIa-2
Gt_36115	RLK-Pelle_RLCK-VIII
Gt_51939	RLK-Pelle_RLCK-X
Gt_59813	RLK-Pelle_RLCK-XII-1
Gt_10816	RLK-Pelle_RLCK-XV
Gt_3652	RLK-Pelle_SD-2b
Gt_856	RLK-Pelle_SD-2b
Gt_54880	RLK-Pelle_URK-1
Gt_20436	RLK-Pelle_WAK_LRK10L-1
Gt_51835	RWP-RK
Gt_5576	SBP
Gt_16784	SBP
Gt_82163	SBP
Gt_64794	SET
Gt_27498	SNF2
Gt_57387	STE_STE11
Gt_71912	STE_STE11
Gt_13749	STE_STE11
Gt_58264	STE_STE20-Fray
Gt_30895	STE_STE20-Fray
Gt_69116	STE_STE20-YSK
Gt_4615	STE_STE20-YSK
Gt_11956	TAZ
Gt_65091	TCP
Gt_37065	TCP
Gt_56865	TCP
Gt_33584	Tify
Gt_26985	Tify
Gt_14301	Tify
Gt_47502	TKL_CTR1-DRK-2
Gt_54106	TKL_CTR1-DRK-2
Gt_65272	TKL_Gdt
Gt_24189	TKL-Pl-4
Gt_58927	TKL-Pl-4
Gt_70756	TKL-Pl-4
Gt_58915	TKL-Pl-4
Gt_24398	TKL-Pl-5
Gt_25547	TKL-Pl-6
Gt_28049	TKL-Pl-7
Gt_36317	TKL-Pl-7
Gt_42083	TRAF
Gt_22907	TRAF
Gt_29623	Trihelix
Gt_36821	Trihelix
Gt_30427	Trihelix
Gt_45033	Trihelix
Gt_79079	TUB
Gt_5605	TUB
Gt_48989	TUB
Gt_8950	TUB
Gt_146	ULK_Fused
Gt_67454	Whirly
Gt_2082	WNK_NRBP
Gt_75046	WRKY
Gt_65595	WRKY
Gt_12267	WRKY
Gt_77309	WRKY
Gt_65787	WRKY
Gt_72002	WRKY
Gt_8190	WRKY
Gt_63591	WRKY
Gt_62689	zf-HD
