# Supplementary material for: Comprehensive transcriptomic profiling reveals complex molecular mechanisms in the regulation of style-length dimorphism in Guettarda speciosa (Rubiaceae), a species with “anomalous” distyly
Source: Front Plant Sci. 2023 Mar 16;14:1116078. doi: 10.3389/fpls.2023.1116078 (PMC10060554; doi:10.3389/fpls.2023.1116078)
Supplement: Supplementary file 7 [file Table_2.xlsx]

## Sheet: GO Enrichment (style)
NAME	GO ID	SIZE	ES	NES	Q-value	RANK AT MAX
Brassinosteroid homeostasis	GO_0030643	18	-0.830944	-2.25368	0.000384	6019
Brassinosteroid biosynthetic process	GO_0009693	18	-0.857904	-2.19732	0.000629	4533
Fruit ripening	GO_0009835	20	-0.840567	-2.18601	0.000674	4533
Ethylene biosynthetic process	GO_0010268	27	-0.75277	-2.13367	0.000829	5123
Asparagine biosynthetic process	GO_0046475	18	-0.830944	-2.11544	0.00393515	6019
Negative regulation of endopeptidase activity	GO_0010951	33	-0.710114	-2.10811	0.0265268	5055
Toxin catabolic process	GO_0009407	16	-0.820556	-2.08644	0.0299977	1905
Sterol metabolic process	GO_0016125	47	-0.62034	-2.00137	0.0302511	7211
Cell wall macromolecule catabolic process	GO_0006168	13	-0.787996	-1.8931	0.0315149	2988
Chitin catabolic process	GO_0006032	29	-0.653204	-1.8768	0.0526929	3151
Seed coat development	GO_0010214	19	-0.68175	-1.81878	0.0569672	5937
Cellular amino acid metabolic process	GO_0006520	86	-0.508976	-1.81285	0.0594162	4809
Sodium ion transport	GO_0006814	23	-0.6348	-1.77813	0.0895925	8186
Protein sumoylation	GO_0016925	36	-0.582377	-1.72996	0.148976	2150
Purine nucleoside catabolic process	GO_0006152	11	-0.743045	-1.72228	0.149569	6336
Lignin catabolic process	GO_0046274	16	-0.696141	-1.73313	0.149778	5403
Methylglyoxal catabolic process to d-lactate via s-lactoyl-glutathione	GO_0019243	11	-0.738522	-1.72436	0.152062	7498
Positive regulation of cytokinin-activated signaling pathway	GO_0080038	6	-0.900055	-1.73476	0.153927	603
Vacuolar protein processing	GO_0006624	8	-0.805771	-1.69755	0.173027	464
Spermine biosynthetic process	GO_0006597	24	-0.613203	-1.69868	0.17648	10156
Inositol catabolic process	GO_0019310	21	-0.625363	-1.68474	0.176881	4159
L-lysine transmembrane transport	GO_1903401	17	-0.667071	-1.68908	0.179003	3035
Ribonucleoside monophosphate biosynthetic process	GO_0009156	8	-0.780876	-1.69138	0.180201	5188
Spermidine biosynthetic process	GO_0008295	31	-0.576177	-1.68564	0.180574	10156
L-glutamate transmembrane transport	GO_0089711	16	-0.674888	-1.69904	0.182192	4416
Strigolactone biosynthetic process	GO_1901601	10	-0.749364	-1.67209	0.188499	7888
Proline catabolic process	GO_0006562	8	-0.797622	-1.69936	0.188756	7439
Abscisic acid metabolic process	GO_0009687	14	-0.681001	-1.67312	0.191837	4671
Endosperm development	GO_0009960	13	-0.699484	-1.67563	0.192094	743
S-adenosylmethioninamine biosynthetic process	GO_0006557	22	-0.625292	-1.66426	0.200783	10156
Monopolar cell growth	GO_0042814	9	-0.755914	-1.6583	0.203489	1176
Branched-chain amino acid metabolic process	GO_0009081	9	-0.790269	-1.65842	0.208561	7318
Sucrose biosynthetic process	GO_0005986	18	-0.636643	-1.6416	0.231046	5731
Mitochondrial respiratory chain complex iii assembly	GO_0034551	8	-0.759639	-1.61979	0.277448	1037
Glycogen metabolic process	GO_0005977	13	-0.668053	-1.62165	0.279023	3759
Raffinose catabolic process	GO_0034484	7	-0.795922	-1.61376	0.288971	9196
Response to wounding	GO_0009611	70	-0.460937	-1.59545	0.33863	3501
Chloroplast-nucleus signaling pathway	GO_0010019	6	-0.805959	-1.58718	0.351441	4321
Thylakoid membrane organization	GO_0010027	44	-0.505726	-1.58804	0.355899	10941
Misfolded or incompletely synthesized protein catabolic process	GO_0006515	18	-0.596234	-1.56121	0.403827	6503
Oxalate metabolic process	GO_0033609	11	-0.685179	-1.56735	0.405108	2373
Petal development	GO_0048441	12	-0.650776	-1.5623	0.407708	1176
Mitochondrial fission	GO_0000266	10	-0.688332	-1.56416	0.408682	701
Lactate biosynthetic process	GO_0019249	6	-0.813833	-1.56794	0.41183	5971
Proteolysis involved in cellular protein catabolic process	GO_0051603	171	-0.400184	-1.55676	0.412471	4723
Nucleotide biosynthetic process	GO_0009165	14	-0.628342	-1.5487	0.434886	5188
Phosphate ion transport	GO_0006817	19	-0.589708	-1.54246	0.450129	6082
Metabolic process	GO_0008152	492	-0.353471	-1.53819	0.458052	5644
Macromolecule metabolic process	GO_0043170	11	-0.664438	-1.53492	0.462325	761
Response to stress	GO_0006950	185	-0.386635	-1.5244	0.495668	9651
Uridine catabolic process	GO_0006218	7	-0.738678	-1.52002	0.496965	2851
Cellular response to phosphate starvation	GO_0016036	42	-0.490132	-1.51764	0.497636	10154
Riboflavin biosynthetic process	GO_0009231	21	-0.571865	-1.52192	0.497762	3652
Negative regulation of dna endoreduplication	GO_0032876	9	-0.698867	-1.491	0.498477	603
Basic amino acid transport	GO_0015802	6	-0.767678	-1.48854	0.500747	6971
Aromatic amino acid family metabolic process	GO_0009072	11	-0.656992	-1.49214	0.500802	7260
Positive regulation of mitotic cell cycle	GO_0045931	5	-0.819449	-1.4957	0.508383	6601
Defense response	GO_0006952	311	-0.359923	-1.50487	0.509234	8451
L-arginine import	GO_0043091	13	-0.617076	-1.49352	0.509617	3035
Tyrosine catabolic process	GO_0006572	14	-0.627026	-1.50837	0.510818	6143
Oxylipin biosynthetic process	GO_0031408	35	-0.489018	-1.497	0.51084	7513
Nucleoside metabolic process	GO_0009116	34	-0.509912	-1.49798	0.514339	6033
Arginine transmembrane transport	GO_1903826	7	-0.74486	-1.50903	0.516415	3035
Sodium ion transmembrane transport	GO_0035725	34	-0.500005	-1.50501	0.516488	4934
Ribosome disassembly	GO_0032790	9	-0.6977	-1.49907	0.518135	3130
Removal of superoxide radicals	GO_0019430	33	-0.509849	-1.5007	0.518559	13289
Response to reactive oxygen species	GO_0000302	8	-0.735153	-1.5095	0.522742	7485
Response to uv-b	GO_0010224	33	-0.498919	-1.47841	0.532516	2651
Telomere capping	GO_0016233	5	-0.782688	-1.47255	0.535049	607
Protein import into peroxisome matrix docking	GO_0016560	23	-0.540908	-1.47588	0.535769	6548
Rna catabolic process	GO_0006401	13	-0.600392	-1.47325	0.538907	1112
Malate transmembrane transport	GO_0071423	22	-0.530792	-1.45989	0.550855	8596
Response to stimulus	GO_0050896	99	-0.402758	-1.46138	0.551581	4704
Protein tetramerization	GO_0051262	9	-0.667821	-1.45779	0.552215	8955
Calcium ion homeostasis	GO_0055074	19	-0.555325	-1.46208	0.555599	6065
Coenzyme a metabolic process	GO_0015936	23	-0.543291	-1.46488	0.558134	2684
Regulation of timing of transition from vegetative to reproductive phase	GO_0048510	11	-0.651861	-1.45415	0.559608	6123
Cellular copper ion homeostasis	GO_0006878	14	-0.610539	-1.46267	0.55981	3714
Seed dormancy process	GO_0010162	7	-0.713834	-1.45226	0.560406	8143
Acetyl-coa biosynthetic process from acetate	GO_0019427	5	-0.779175	-1.4429	0.569923	7776
Tetrahydrobiopterin biosynthetic process	GO_0006729	9	-0.657154	-1.44592	0.571128	490
Defense response incompatible interaction	GO_0009814	10	-0.630205	-1.44292	0.576145	7734
De novo ctp biosynthetic process	GO_0044210	21	-0.547199	-1.44595	0.577371	9889
Chloroplast rna modification	GO_1900865	9	-0.664137	-1.43769	0.583898	8060
Anther wall tapetum cell differentiation	GO_0048657	9	-0.651956	-1.41996	0.634135	5243
Regulation of protein serine/threonine phosphatase activity	GO_0080163	45	-0.452423	-1.42265	0.636274	6732
Transcription-dependent tethering of rna polymerase ii gene dna at nuclear periphery	GO_0000972	5	-0.760149	-1.42051	0.638373	5093
Growth	GO_0040007	28	-0.493422	-1.41713	0.639063	7673
Zinc ii ion transport	GO_0006829	10	-0.616637	-1.41419	0.644532	5911
Maturation of 5.8s rrna	GO_0000460	16	-0.554723	-1.41133	0.649086	9666
Regulation of ethylene-activated signaling pathway	GO_0010104	18	-0.546897	-1.39701	0.668067	9374
Plant-type secondary cell wall biogenesis	GO_0009834	42	-0.449095	-1.39055	0.67014	6569
Glutathione catabolic process	GO_0006751	9	-0.642351	-1.39492	0.670569	6038
Glycosyl compound metabolic process	GO_1901657	31	-0.474954	-1.39338	0.670624	8390
Meristem development	GO_0048507	9	-0.63038	-1.38869	0.671578	14147
Homogentisate catabolic process	GO_1902000	11	-0.612174	-1.3914	0.672788	6143
Mitochondrial respiratory chain complex assembly	GO_0033108	19	-0.534717	-1.39735	0.673149	8796
Telomere maintenance via recombination	GO_0000722	5	-0.776052	-1.39867	0.674493	607
Phytol metabolic process	GO_0033306	7	-0.70258	-1.399	0.679632	11489
Malate transport	GO_0015743	6	-0.71049	-1.38513	0.679745	8746
Regulation of pentose-phosphate shunt	GO_0043456	14	-0.586834	-1.40205	0.680151	2720
L-glutamate import	GO_0051938	10	-0.620543	-1.40031	0.680731	3016
De novo imp biosynthetic process	GO_0006189	16	-0.551508	-1.37921	0.697576	8955
Protein metabolic process	GO_0019538	27	-0.488384	-1.37662	0.70195	4734
Multicellular organism development	GO_0007275	126	-0.362101	-1.36815	0.705314	5488
Isoprenoid biosynthetic process	GO_0008299	64	-0.410376	-1.37404	0.706629	2684
Negative regulation of cell growth	GO_0030308	6	-0.688447	-1.36628	0.706838	1024
Transcription from rna polymerase ii promoter	GO_0006366	83	-0.380661	-1.36429	0.709262	8618
Histone h4 acetylation	GO_0043967	5	-0.737708	-1.3627	0.709529	1054
Nucleobase-containing compound metabolic process	GO_0006139	11	-0.595126	-1.36845	0.710248	16070
Histone h3 deacetylation	GO_0070932	11	-0.592475	-1.37148	0.710338	788
Regulation of cellular process	GO_0050794	53	-0.420082	-1.36948	0.712265	6622
Organic substance metabolic process	GO_0071704	23	-0.487572	-1.34749	0.713149	12020
Molybdate ion transport	GO_0015689	13	-0.569368	-1.35448	0.713404	6119
Protein processing involved in protein targeting to mitochondrion	GO_0006627	28	-0.476772	-1.35265	0.714839	8796
Glucuronoxylan biosynthetic process	GO_0010417	13	-0.564831	-1.34955	0.715859	5429
Response to chlorate	GO_0010157	5	-0.724568	-1.34767	0.71791	10751
Secondary shoot formation	GO_0010223	17	-0.534062	-1.35467	0.718453	2357
Negative regulation of transcription dna-templated	GO_0045892	68	-0.394366	-1.34977	0.720518	2797
Regulation of defense response	GO_0031347	34	-0.452777	-1.35516	0.722488	8750
Response to nematode	GO_0009624	8	-0.646472	-1.35655	0.722599	4416
Cleavage involved in rrna processing	GO_0000469	7	-0.670871	-1.35758	0.724242	504
Cellular process	GO_0009987	106	-0.369372	-1.34005	0.725797	5674
Tetrahydrofolate biosynthetic process	GO_0046654	15	-0.537063	-1.33821	0.727558	10380
Shikimate metabolic process	GO_0019632	17	-0.528279	-1.342	0.729331	8342
Seed maturation	GO_0010431	14	-0.550279	-1.34018	0.730847	5294
Copper ion transmembrane transport	GO_0035434	10	-0.5985	-1.33327	0.736574	6260
Glutamate decarboxylation to succinate	GO_0006540	5	-0.706642	-1.33404	0.739058	10587
Pollen tube reception	GO_0010483	8	-0.630433	-1.31653	0.743606	1024
Response to selenium ion	GO_0010269	6	-0.67745	-1.32663	0.746364	11608
Iron incorporation into metallo-sulfur cluster	GO_0018283	6	-0.67745	-1.31442	0.746723	11608
Protein-tetrapyrrole linkage	GO_0017006	10	-0.583371	-1.31671	0.748033	7386
Homocysteine metabolic process	GO_0050667	5	-0.703074	-1.32891	0.748466	450
Copper ion export	GO_0060003	6	-0.672746	-1.3219	0.749139	7374
Regulation of isopentenyl diphosphate biosynthetic process methylerythritol 4-phosphate pathway	GO_0010322	5	-0.710797	-1.32701	0.750201	861
Cysteine metabolic process	GO_0006534	6	-0.67745	-1.32009	0.750718	11608
Mitochondrial transport	GO_0006839	8	-0.623833	-1.31187	0.751608	6175
Cellular response to nitrogen starvation	GO_0006995	32	-0.449373	-1.31703	0.752035	16819
Regulation of 1-deoxy-d-xylulose-5-phosphate synthase activity	GO_1902395	5	-0.710797	-1.32381	0.752183	861
Ubiquinone-6 biosynthetic process	GO_1901006	7	-0.636326	-1.32205	0.753594	4894
Cellular protein localization	GO_0034613	7	-0.657066	-1.30685	0.760687	4556
Potassium ion transport	GO_0006813	25	-0.46582	-1.30727	0.764019	6630
L-arabinose metabolic process	GO_0046373	7	-0.645396	-1.30378	0.767495	15973
Double-strand break repair via homologous recombination	GO_0000724	40	-0.422919	-1.30221	0.768573	607
Plasmodesmata-mediated intercellular transport	GO_0010497	7	-0.647345	-1.27118	0.769544	11401
Glucose transmembrane transport	GO_1904659	104	-0.351769	-1.30043	0.770459	12060
Regulation of defense response to fungus incompatible interaction	GO_2000072	5	-0.693717	-1.29866	0.772501	10320
Tryptophan biosynthetic process	GO_0000162	45	-0.402899	-1.27208	0.774961	1500
Uracil catabolic process	GO_0006212	16	-0.504462	-1.26768	0.777866	8507
Chlorophyll metabolic process	GO_0015994	9	-0.590764	-1.27211	0.779265	3809
Gamma-aminobutyric acid catabolic process	GO_0009450	5	-0.706642	-1.28425	0.779939	10587
Cellular response to amino acid stimulus	GO_0071230	5	-0.689411	-1.2853	0.78067	11353
Maturation of lsu-rrna	GO_0000470	35	-0.427809	-1.27248	0.782283	9666
Dna-dependent dna replication	GO_0006261	20	-0.492046	-1.28581	0.783446	7821
Imp salvage	GO_0032264	9	-0.599533	-1.28644	0.785666	8967
Sucrose transport	GO_0015770	14	-0.5209	-1.27248	0.786773	8181
Isopentenyl diphosphate biosynthetic process methylerythritol 4-phosphate pathway	GO_0019288	20	-0.478894	-1.26237	0.788209	10171
Galactose biosynthetic process	GO_0046369	6	-0.662905	-1.29177	0.789468	6149
Xylan biosynthetic process	GO_0045492	6	-0.660847	-1.28648	0.79033	5578
Dna replication removal of rna primer	GO_0043137	6	-0.653915	-1.27271	0.790572	978
Dna methylation	GO_0006306	17	-0.503169	-1.27508	0.791069	12839
Response to unfolded protein	GO_0006986	9	-0.584514	-1.26245	0.792271	11208
Protein localization	GO_0008104	10	-0.573317	-1.28821	0.793111	1692
Plant organ development	GO_0099402	7	-0.609271	-1.24233	0.793298	8103
Purine nucleobase catabolic process	GO_0006145	11	-0.553111	-1.27698	0.793425	16116
Protein o-linked mannosylation	GO_0035269	16	-0.506321	-1.27317	0.793507	11021
Receptor-mediated endocytosis	GO_0006898	8	-0.596993	-1.27563	0.793582	8025
Glycerol metabolic process	GO_0006071	6	-0.65356	-1.2867	0.794329	5495
Photoinhibition	GO_0010205	15	-0.514372	-1.29179	0.794423	11907
Detection of visible light	GO_0009584	10	-0.583371	-1.28888	0.795315	7386
Protein processing	GO_0016485	94	-0.355404	-1.2439	0.795831	6917
Cellular macromolecule biosynthetic process	GO_0034645	12	-0.524374	-1.24031	0.796527	9392
Signal peptide processing	GO_0006465	54	-0.381773	-1.24259	0.79657	12185
Rna splicing via transesterification reactions	GO_0000375	9	-0.577183	-1.25864	0.797361	631
Cysteine biosynthetic process from serine	GO_0006535	15	-0.513139	-1.27705	0.797863	15870
Vegetative to reproductive phase transition of meristem	GO_0010228	41	-0.407212	-1.24425	0.798778	11927
Aspartate metabolic process	GO_0006531	5	-0.673147	-1.27803	0.798838	4225
Amino acid import	GO_0043090	10	-0.55976	-1.23507	0.798962	600
Branched-chain amino acid biosynthetic process	GO_0009082	6	-0.635259	-1.23327	0.801273	10927
Posttranscriptional gene silencing	GO_0016441	5	-0.666041	-1.24456	0.80178	9203
Nitrogen compound metabolic process	GO_0006807	33	-0.413323	-1.23533	0.802017	10699
Secondary metabolite biosynthetic process	GO_0044550	86	-0.350976	-1.24558	0.802327	2589
Response to light stimulus	GO_0009416	59	-0.370636	-1.2513	0.802941	8251
Sulfate assimilation	GO_0000103	61	-0.375203	-1.25238	0.803076	6438
Glycerol ether metabolic process	GO_0006662	58	-0.378314	-1.236	0.803695	6353
Positive regulation of flower development	GO_0009911	40	-0.408439	-1.25575	0.803757	2651
Chaperone mediated protein folding requiring cofactor	GO_0051085	8	-0.585367	-1.24625	0.803924	11208
Embryo development	GO_0009790	14	-0.510517	-1.24712	0.804938	3163
Gene silencing by rna	GO_0031047	26	-0.436169	-1.23667	0.8054	2991
Rna phosphodiester bond hydrolysis endonucleolytic	GO_0090502	96	-0.339651	-1.22289	0.805912	2991
Ureide catabolic process	GO_0010136	11	-0.553111	-1.25381	0.8066	16116
Organelle organization	GO_0006996	8	-0.587794	-1.25254	0.806752	9736
Transcription from plastid promoter	GO_0042793	11	-0.542757	-1.24747	0.807774	885
Biosynthetic process	GO_0009058	130	-0.326707	-1.22338	0.808082	10613
Cellular oxidant detoxification	GO_0098869	137	-0.326996	-1.23	0.808559	8802
Isoleucyl-trna aminoacylation	GO_0006428	8	-0.577843	-1.22431	0.808781	18071
Endoplasmic reticulum tubular network organization	GO_0071786	11	-0.529053	-1.21866	0.809277	13822
Polyamine biosynthetic process	GO_0006596	7	-0.604645	-1.24786	0.810815	15412
Adenine biosynthetic process	GO_0046084	6	-0.638266	-1.21916	0.811378	6296
Protein localization to nuclear inner membrane	GO_0036228	5	-0.675818	-1.22687	0.811693	4592
Response to desiccation	GO_0009269	16	-0.48952	-1.22567	0.811875	471
Protein hexamerization	GO_0034214	6	-0.629875	-1.22447	0.812039	3788
Cop9 signalosome assembly	GO_0010387	9	-0.56001	-1.21984	0.812891	535
D-xylose metabolic process	GO_0042732	7	-0.597161	-1.22761	0.813243	8457
Serine family amino acid biosynthetic process	GO_0009070	6	-0.605098	-1.19121	0.821017	15171
Regulation of root meristem growth	GO_0010082	14	-0.500241	-1.19412	0.821777	603
Response to molecule of bacterial origin	GO_0002237	18	-0.46261	-1.19191	0.822307	6147
Phyllome development	GO_0048827	14	-0.488782	-1.19487	0.822813	2126
Positive regulation of seed germination	GO_0010030	6	-0.607852	-1.19228	0.824454	15852
Lipid x metabolic process	GO_2001289	6	-0.609	-1.19537	0.824488	17611
Defense response to oomycetes	GO_0002229	8	-0.577778	-1.21251	0.826617	5525
Histidine biosynthetic process	GO_0000105	29	-0.413247	-1.19542	0.827873	10245
Response to biotic stimulus	GO_0009607	70	-0.352093	-1.19964	0.828304	5205
Cellular response to extracellular stimulus	GO_0031668	14	-0.490119	-1.19619	0.828891	1987
Dolichol metabolic process	GO_0019348	15	-0.494374	-1.19827	0.829065	11021
Glucose import	GO_0046323	137	-0.31448	-1.19688	0.830118	12060
Methylammonium transmembrane transport	GO_0072489	6	-0.61457	-1.20018	0.830197	2535
Pigment biosynthetic process	GO_0046148	9	-0.557852	-1.20964	0.832465	6091
Organic substance transport	GO_0071702	8	-0.588893	-1.20036	0.833251	8703
Nucleosome assembly	GO_0006334	66	-0.357209	-1.20038	0.836914	13190
Trna threonylcarbamoyladenosine modification	GO_0002949	6	-0.603878	-1.20112	0.838097	4791
Phenylalanyl-trna aminoacylation	GO_0006432	11	-0.505659	-1.18161	0.838782	11425
Primary metabolic process	GO_0044238	55	-0.364752	-1.2028	0.840037	9561
Calcium ion transport	GO_0006816	7	-0.585607	-1.20385	0.840409	9339
Proton transport	GO_0015992	181	-0.304169	-1.20147	0.840636	12060
Gpi anchor biosynthetic process	GO_0006506	43	-0.396294	-1.20603	0.840932	7204
Mrna 5 -splice site recognition	GO_0000395	6	-0.610796	-1.184	0.841429	6673
Positive regulation of gibberellic acid mediated signaling pathway	GO_0009939	5	-0.638347	-1.17855	0.841794	4224
Molybdopterin cofactor biosynthetic process	GO_0032324	5	-0.632375	-1.18168	0.842032	12445
Allantoin catabolic process	GO_0000256	9	-0.534016	-1.17932	0.842853	12434
Embryonic pattern specification	GO_0009880	7	-0.578777	-1.18233	0.843547	18773
Exocyst localization	GO_0051601	21	-0.452884	-1.20404	0.843635	11730
Cellular nitrogen compound biosynthetic process	GO_0044271	9	-0.534899	-1.17256	0.851232	9392
Arabinan catabolic process	GO_0031222	20	-0.436996	-1.17323	0.852731	2847
S-adenosylmethionine cycle	GO_0033353	6	-0.594029	-1.16984	0.853356	1576
Protein homotetramerization	GO_0051289	12	-0.500476	-1.17048	0.85463	15665
Flavonol biosynthetic process	GO_0051555	14	-0.481656	-1.17369	0.854685	6943
De novo amp biosynthetic process	GO_0044208	6	-0.594424	-1.16826	0.854999	13360
C-terminal protein lipidation	GO_0006501	7	-0.563135	-1.16343	0.864049	9939
Positive regulation of cell proliferation	GO_0008284	15	-0.471743	-1.16403	0.865587	3169
Rna splicing	GO_0008380	44	-0.3612	-1.1589	0.869238	9150
Regulation of nitrogen utilization	GO_0006808	5	-0.637593	-1.15497	0.871985	8999
Heat acclimation	GO_0010286	13	-0.484837	-1.15909	0.872042	6438
Leaf senescence	GO_0010150	47	-0.36099	-1.16002	0.872255	4567
Plant-type primary cell wall biogenesis	GO_0009833	12	-0.502736	-1.15666	0.873212	889
Defense response to bacterium incompatible interaction	GO_0009816	29	-0.399278	-1.15558	0.873348	14624
Ion transport	GO_0006811	33	-0.394726	-1.15315	0.874513	7108
Dna duplex unwinding	GO_0032508	66	-0.332819	-1.14205	0.88071	15490
Sporopollenin biosynthetic process	GO_0080110	5	-0.607984	-1.14231	0.883276	8184
Posttranscriptional tethering of rna polymerase ii gene dna at nuclear periphery	GO_0000973	7	-0.555641	-1.13062	0.884638	10438
Inflorescence development	GO_0010229	14	-0.472384	-1.13839	0.885641	4254
Cytoskeleton-dependent intracellular transport	GO_0030705	9	-0.522323	-1.14252	0.885857	508
Phospholipid biosynthetic process	GO_0008654	14	-0.468449	-1.13622	0.886059	12129
Potassium ion transmembrane transport	GO_0071805	154	-0.295415	-1.13721	0.88609	6692
Animal organ development	GO_0048513	8	-0.551566	-1.13078	0.887369	19977
Nitrate transport	GO_0015706	11	-0.501563	-1.13875	0.887798	5596
Fruit dehiscence	GO_0010047	7	-0.554497	-1.14294	0.887874	2599
Mitochondrial alanyl-trna aminoacylation	GO_0070143	23	-0.428023	-1.13092	0.890134	6693
L-ascorbic acid biosynthetic process	GO_0019853	7	-0.554319	-1.14322	0.890192	2089
Response to nutrient	GO_0007584	9	-0.513469	-1.13379	0.89064	18323
Defense response to fungus incompatible interaction	GO_0009817	30	-0.390143	-1.13265	0.891055	8712
Regulation of biological process	GO_0050789	30	-0.397618	-1.14501	0.891185	3053
Aspartate family amino acid biosynthetic process	GO_0009067	9	-0.532608	-1.14383	0.891647	6923
L-phenylalanine catabolic process	GO_0006559	32	-0.392341	-1.14579	0.891948	6935
Dna integration	GO_0015074	27	-0.402105	-1.13102	0.893083	13852
Secondary metabolic process	GO_0019748	25	-0.402317	-1.14598	0.894705	9846
Protein deneddylation	GO_0010388	18	-0.440706	-1.12344	0.89472	535
Photosystem ii stabilization	GO_0042549	6	-0.577901	-1.12247	0.894795	12591
Killing of cells of other organism	GO_0031640	10	-0.504471	-1.1243	0.895027	2351
Anatomical structure development	GO_0048856	22	-0.413778	-1.12476	0.89691	10112
Response to ethylene	GO_0009723	61	-0.334677	-1.12544	0.898018	5771
Deoxyribonucleotide biosynthetic process	GO_0009263	6	-0.575529	-1.11859	0.903989	5488
Mitochondrion organization	GO_0007005	21	-0.416226	-1.11419	0.915505	12147
Pattern recognition receptor signaling pathway	GO_0002221	7	-0.551235	-1.11275	0.916944	7422
Carboxylic acid metabolic process	GO_0019752	17	-0.423562	-1.10741	0.917528	10811
Xylan catabolic process	GO_0045493	21	-0.420668	-1.11151	0.917775	4471
Protein dephosphorylation	GO_0006470	380	-0.257889	-1.10821	0.918295	7203
Gene expression	GO_0010467	15	-0.447008	-1.10921	0.918577	17121
Chloroplast relocation	GO_0009902	8	-0.533572	-1.11022	0.91861	5397
Regulation of microtubule-based process	GO_0032886	8	-0.528246	-1.07049	0.920609	508
Single-organism process	GO_0044699	71	-0.317536	-1.10546	0.920732	9984
Starch biosynthetic process	GO_0019252	50	-0.332183	-1.07071	0.922766	8218
Rna 3 -end processing	GO_0031123	13	-0.445393	-1.07251	0.923368	5573
Leaf vascular tissue pattern formation	GO_0010305	17	-0.428037	-1.07319	0.924167	4540
Protein ubiquitination	GO_0016567	406	-0.244468	-1.05496	0.925092	8041
Regulation of jasmonic acid mediated signaling pathway	GO_2000022	18	-0.414447	-1.07088	0.92511	10360
Endoplasmic reticulum unfolded protein response	GO_0030968	22	-0.395441	-1.0661	0.925498	5320
Cell plate assembly	GO_0000919	10	-0.468691	-1.0583	0.926306	1499
Pentacyclic triterpenoid biosynthetic process	GO_0019745	12	-0.43805	-1.05263	0.926461	10941
Isoleucine biosynthetic process	GO_0009097	10	-0.478498	-1.0648	0.926513	9753
G-protein coupled receptor signaling pathway	GO_0007186	35	-0.361946	-1.10254	0.926719	5529
Protein catabolic process	GO_0030163	125	-0.286968	-1.07324	0.926895	6534
Peptidyl-tyrosine dephosphorylation	GO_0035335	76	-0.300301	-1.04761	0.927332	9413
Ceramide metabolic process	GO_0006672	10	-0.493229	-1.05514	0.927391	10368
Single-organism metabolic process	GO_0044710	42	-0.339248	-1.05881	0.927467	6952
De-etiolation	GO_0009704	9	-0.487557	-1.05119	0.927654	10751
Positive regulation of cyclin-dependent protein serine/threonine kinase activity	GO_0045737	21	-0.392053	-1.05307	0.927958	2479
Malate metabolic process	GO_0006108	63	-0.314496	-1.06716	0.928012	6702
Plant-type cell wall biogenesis	GO_0009832	26	-0.381849	-1.06614	0.928182	6211
Autophagosome assembly	GO_0000045	35	-0.357801	-1.05677	0.928222	9401
Positive regulation of phosphorylation of rna polymerase ii c-terminal domain	GO_1901409	20	-0.396941	-1.04812	0.928609	2479
Primary mirna processing	GO_0031053	19	-0.416203	-1.09264	0.929079	1931
Tetracyclic triterpenoid biosynthetic process	GO_0010686	10	-0.478328	-1.08867	0.929197	3282
Meristem initiation	GO_0010014	8	-0.516102	-1.08769	0.929327	16266
Maturation of 5.8s rrna from tricistronic rrna transcript	SSU-RRNA_5.8S_RRNA_LSU-RRNA_	12	-0.449943	-1.05529	0.92965	4408
Rna methylation	GO_0001510	12	-0.457485	-1.08949	0.929707	6365
Negative regulation of abscisic acid-activated signaling pathway	GO_0009788	43	-0.339897	-1.07325	0.929734	2517
Dna replication synthesis of rna primer	GO_0006269	5	-0.563694	-1.04955	0.929824	7870
Acyl-coa metabolic process	GO_0006637	5	-0.561281	-1.05892	0.929895	13003
Negative regulation of cell proliferation	GO_0008285	12	-0.435834	-1.04402	0.929949	2599
Peroxisome fission	GO_0016559	22	-0.406622	-1.09333	0.929962	10399
Regulation of dna-templated transcription elongation	GO_0032784	11	-0.490533	-1.09409	0.930783	8522
Protein oligomerization	GO_0051259	5	-0.564548	-1.04817	0.931171	6438
Amino acid transmembrane transport	GO_0003333	152	-0.283869	-1.08996	0.931172	7418
Snare complex disassembly	GO_0035494	10	-0.483023	-1.07354	0.931711	6702
Udp-l-arabinose metabolic process	GO_0033356	22	-0.382696	-1.04432	0.931762	1741
Dna metabolic process	GO_0006259	30	-0.368391	-1.09764	0.932181	10343
Lipid metabolic process	GO_0006629	200	-0.276085	-1.09564	0.932316	7639
Rna polyadenylation	GO_0043631	13	-0.436065	-1.06085	0.932514	5573
Cellular response to molecule of bacterial origin	GO_0071219	5	-0.57504	-1.05896	0.932547	1949
Protein neddylation	GO_0045116	38	-0.361112	-1.09453	0.932639	10388
Glutamate metabolic process	GO_0006536	21	-0.395607	-1.06167	0.932874	4225
Phenylpropanoid metabolic process	GO_0009698	27	-0.385422	-1.09624	0.933464	2035
Tricarboxylic acid cycle	GO_0006099	116	-0.283524	-1.05948	0.933811	8732
Leaf morphogenesis	GO_0009965	60	-0.328013	-1.09009	0.933867	3067
Phosphatidylcholine metabolic process	GO_0046470	25	-0.375348	-1.0445	0.933872	10154
Glycogen biosynthetic process	GO_0005978	30	-0.360629	-1.04173	0.93394	8218
Phospholipid translocation	GO_0045332	29	-0.366491	-1.07356	0.934568	9149
Plasma membrane pyruvate transport	GO_0006849	5	-0.580617	-1.09773	0.935021	11719
Regulation of primary metabolic process	GO_0080090	14	-0.400842	-0.973612	0.936162	13721
Chorismate metabolic process	GO_0046417	11	-0.472436	-1.09835	0.936386	10110
Jasmonic acid mediated signaling pathway	GO_0009867	27	-0.375943	-1.07371	0.937033	1197
Singlet oxygen-mediated programmed cell death	GO_0010343	11	-0.475619	-1.07449	0.937504	1156
Establishment of cell polarity	GO_0030010	5	-0.574115	-1.07536	0.937925	18773
Systemic acquired resistance	GO_0009627	9	-0.494743	-1.07623	0.938255	1757
Membrane protein proteolysis	GO_0033619	22	-0.36304	-0.973641	0.938269	11569
Cellular response to oxidative stress	GO_0034599	63	-0.325897	-1.07783	0.939125	6438
Plastid translation	GO_0032544	12	-0.413716	-0.974878	0.939499	9611
Flavonoid biosynthetic process	GO_0009813	147	-0.282817	-1.07869	0.939576	6901
Chloroplast rna processing	GO_0031425	8	-0.466503	-0.986067	0.939601	9999
Ribosome biogenesis	GO_0042254	71	-0.287746	-0.97718	0.940075	6295
Ump salvage	GO_0044206	10	-0.43554	-0.984142	0.940082	11564
Copper ion transport	GO_0006825	6	-0.504957	-0.976278	0.940158	1307
Mitotic chromosome condensation	GO_0007076	14	-0.400049	-0.973689	0.940342	6221
Atp biosynthetic process	GO_0006754	50	-0.307635	-0.984878	0.940396	6898
Trna methylation	GO_0030488	27	-0.382596	-1.07937	0.940422	9605
L-serine transport	GO_0015825	9	-0.492123	-1.08022	0.940677	14861
Ribosomal small subunit export from nucleus	GO_0000056	8	-0.499704	-1.07631	0.941003	1757
Plant ovule development	GO_0048481	56	-0.327199	-1.082	0.941245	7892
Phosphorylation of rna polymerase ii c-terminal domain	GO_0070816	7	-0.468569	-0.968094	0.941326	9283
Response to oxidative stress	GO_0006979	135	-0.25741	-0.97503	0.94133	7693
Post-embryonic development	GO_0009791	42	-0.315172	-0.986224	0.941467	3490
Sulfate transmembrane transport	GO_1902358	19	-0.376968	-0.981569	0.942072	6354
Peptidyl-cysteine oxidation	GO_0018171	12	-0.421259	-0.977268	0.942117	12404
Regulation of intracellular ph	GO_0051453	64	-0.323721	-1.08262	0.942329	6898
Auxin-activated signaling pathway	GO_0009734	176	-0.248586	-0.969417	0.942386	3836
Detection of hypoxia	GO_0070483	12	-0.421259	-0.960856	0.94242	12404
Etioplast organization	GO_0009662	6	-0.515987	-0.986618	0.942739	9899
Rna-dependent dna biosynthetic process	GO_0006278	14	-0.411393	-0.987437	0.942827	14630
Flavonoid glucuronidation	GO_0052696	122	-0.257673	-0.968276	0.943034	6901
Gluconeogenesis	GO_0006094	46	-0.306803	-0.965604	0.943235	9600
Tetrahydrofolylpolyglutamate metabolic process	GO_0046900	5	-0.582978	-1.0803	0.943447	18782
Protein n-linked glycosylation	GO_0006487	48	-0.301368	-0.961248	0.943595	13228
Aerobic respiration	GO_0009060	20	-0.371707	-0.981805	0.94376	8938
Positive regulation of transcription dna-templated	GO_0045893	71	-0.282305	-0.977436	0.943887	4774
Zinc ion homeostasis	GO_0055069	5	-0.515455	-0.969611	0.944077	3714
Response to heat	GO_0009408	98	-0.264991	-0.965982	0.944418	11548
Phospholipid transport	GO_0015914	6	-0.506329	-0.992079	0.944556	9990
Oxaloacetate	2-_TRANSMEMBRANE_TRANSPORT_	5	-0.533425	-0.987594	0.944678	4416
Ctp salvage	GO_0044211	9	-0.445425	-0.977841	0.945062	6929
Protein import into chloroplast stroma	GO_0045037	19	-0.365331	-0.961389	0.94544	10751
Cellular protein metabolic process	GO_0044267	51	-0.307189	-0.992493	0.945785	9377
Ribosomal large subunit export from nucleus	GO_0000055	13	-0.420892	-0.995081	0.946	1757
Anaerobic respiration	GO_0009061	12	-0.421259	-0.988881	0.946049	12404
Golgi vesicle transport	GO_0048193	9	-0.453113	-0.987928	0.946115	14448
Cellular glucan metabolic process	GO_0006073	5	-0.535755	-0.989719	0.946156	3729
Carbohydrate phosphorylation	GO_0046835	92	-0.269187	-0.961856	0.946413	14343
Ammonium transmembrane transport	GO_0072488	12	-0.41873	-0.995722	0.946553	6966
Positive regulation of catalytic activity	GO_0043085	26	-0.347907	-0.978109	0.946699	4727
Exocyst assembly	GO_0001927	15	-0.408007	-0.993846	0.946916	11730
Udp-n-acetylglucosamine biosynthetic process	GO_0006048	15	-0.394905	-0.978712	0.947399	12429
Maturation of ssu-rrna	GO_0030490	17	-0.383527	-0.992677	0.947624	504
Photosynthesis	GO_0015979	100	-0.272271	-0.989916	0.947952	11680
Transcription dna-templated	GO_0006351	205	-0.247925	-1.00497	0.948047	7298
Autophagy	GO_0006914	46	-0.302897	-0.961894	0.948458	4700
Response to brassinosteroid	GO_0009741	12	-0.426769	-0.997668	0.948522	1024
Dna ligation involved in dna repair	GO_0051103	15	-0.415655	-1.00573	0.948536	4732
Auxin homeostasis	GO_0010252	21	-0.366878	-0.996703	0.94863	8670
L-methionine salvage from methylthioadenosine	GO_0019509	35	-0.319059	-0.962596	0.948772	14434
Cell wall biogenesis	GO_0042546	49	-0.312386	-0.995776	0.948776	7614
Regulation of cytoplasmic mrna processing body assembly	GO_0010603	16	-0.405697	-1.00633	0.949221	2106
Nucleic acid phosphodiester bond hydrolysis	GO_0090305	127	-0.264606	-0.998183	0.949421	9852
Glycine catabolic process	GO_0006546	7	-0.502825	-1.00715	0.949454	12227
Pyruvate metabolic process	GO_0006090	18	-0.401964	-1.03328	0.950099	1984
Carbon fixation	GO_0015977	14	-0.432075	-1.02936	0.95074	5250
Circadian regulation of gene expression	GO_0032922	9	-0.469799	-1.00836	0.951067	8949
Regulation of gene expression	GO_0010468	56	-0.309445	-1.03385	0.951136	1526
Transport of virus in host cell to cell	GO_0046740	22	-0.37376	-1.00918	0.951227	1342
Pollen tube development	GO_0048868	23	-0.371607	-1.01184	0.95133	3472
Ump biosynthetic process	GO_0006222	12	-0.426956	-0.998228	0.951696	14037
Organic cation transport	GO_0015695	10	-0.452198	-1.00261	0.951788	6966
Arginine catabolic process to glutamate	GO_0019544	6	-0.508248	-1.00174	0.951815	14779
Pyrimidine nucleobase metabolic process	GO_0006206	23	-0.373915	-1.0299	0.951831	12381
Protein import	GO_0017038	5	-0.542499	-1.00717	0.951836	13677
Lipid a biosynthetic process	GO_0009245	12	-0.432714	-1.00971	0.95233	17611
Lagging strand elongation	GO_0006273	12	-0.443976	-0.998829	0.952452	3871
Abscisic acid-activated signaling pathway	GO_0009738	162	-0.267289	-1.03148	0.952515	6732
Xyloglucan metabolic process	GO_0010411	45	-0.329785	-1.03422	0.952666	7614
Pyrimidine nucleoside salvage	GO_0043097	15	-0.41803	-1.03044	0.952891	12381
Dna biosynthetic process	GO_0071897	32	-0.335305	-1.01656	0.953056	7821
Sucrose metabolic process	GO_0005985	54	-0.308415	-0.999441	0.95314	7719
Glycolytic process through fructose-6-phosphate	GO_0061615	32	-0.3475	-1.01929	0.953166	14134
Regulation of meristem growth	GO_0010075	14	-0.423894	-1.012	0.953398	7076
Protein import into mitochondrial intermembrane space	GO_0045041	8	-0.493004	-1.02559	0.953507	10233
Organic acid transmembrane transport	GO_1903825	6	-0.525706	-1.01264	0.953989	13761
Phloem development	GO_0010088	9	-0.458369	-0.999977	0.954033	13140
Regulation of anion transmembrane transport	GO_1903959	57	-0.305364	-1.0099	0.954336	4132
Dna strand renaturation	GO_0000733	5	-0.550991	-1.01694	0.954636	15459
Ribosomal small subunit biogenesis	GO_0042274	11	-0.447482	-1.01966	0.954727	7671
Stress granule assembly	GO_0034063	16	-0.405697	-1.01321	0.954917	2106
Transport	GO_0006810	362	-0.225723	-0.955086	0.955001	6572
Lignin biosynthetic process	GO_0009809	47	-0.319473	-1.01398	0.955297	5616
Starch metabolic process	GO_0005982	17	-0.411718	-1.02571	0.95579	6414
Cadmium ion transmembrane transport	GO_0070574	8	-0.489551	-1.02272	0.956448	8023
Response to hormone	GO_0009725	31	-0.34897	-1.01718	0.956541	7004
Transcription initiation from rna polymerase iii promoter	GO_0006384	6	-0.496172	-0.953578	0.956696	4627
Photosystem ii assembly	GO_0010207	23	-0.371789	-1.01982	0.956824	9719
Hydrogen ion transmembrane transport	GO_1902600	139	-0.265564	-1.01429	0.956935	6898
Cell differentiation	GO_0030154	53	-0.315547	-1.02614	0.957194	8544
Signal transduction	GO_0007165	221	-0.254458	-1.02151	0.95726	4556
Molybdenum incorporation into molybdenum-molybdopterin complex	GO_0018315	8	-0.488747	-1.02292	0.95856	13918
Coumarin biosynthetic process	GO_0009805	6	-0.476436	-0.947964	0.959892	4722
Response to acid chemical	GO_0001101	14	-0.388255	-0.948358	0.961118	6225
Golgi to plasma membrane transport	GO_0006893	6	-0.48115	-0.94841	0.963152	3269
Histone exchange	GO_0043486	6	-0.480649	-0.943642	0.964022	12508
Protein glycosylation	GO_0006486	76	-0.27262	-0.948785	0.964431	9444
Regulation of seed germination	GO_0010029	21	-0.350594	-0.949274	0.96531	6123
Heterochromatin assembly	GO_0031507	6	-0.489973	-0.944669	0.96573	15270
Golgi vesicle docking	GO_0048211	16	-0.3814	-0.943684	0.966055	17851
Glucosinolate catabolic process	GO_0019762	10	-0.424019	-0.941895	0.966175	3405
Protein farnesylation	GO_0018343	14	-0.374133	-0.906803	0.970588	2609
Positive regulation of ubiquitin-protein transferase activity	GO_0051443	14	-0.370327	-0.907282	0.971452	9513
Peptide catabolic process	GO_0043171	25	-0.329352	-0.936923	0.971996	11297
Interstrand cross-link repair	GO_0036297	7	-0.464109	-0.937679	0.97228	8798
Amylopectin biosynthetic process	GO_0010021	10	-0.422657	-0.93822	0.973061	6513
Glutamate biosynthetic process	GO_0006537	11	-0.394006	-0.907387	0.973172	12717
Temperature compensation of the circadian clock	GO_0010378	16	-0.359699	-0.90822	0.973209	456
Anion transmembrane transport	GO_0098656	28	-0.317196	-0.908285	0.975033	4879
Protoporphyrinogen ix biosynthetic process	GO_0006782	23	-0.331264	-0.908636	0.976272	13403
Methionyl-trna aminoacylation	GO_0006431	8	-0.425757	-0.903424	0.976488	13433
Phospholipid catabolic process	GO_0009395	13	-0.387962	-0.909162	0.977129	11126
Cellular response to gamma radiation	GO_0071480	5	-0.4978	-0.933606	0.978129	13246
Nitrogen fixation	GO_0009399	15	-0.372415	-0.910359	0.978358	8999
Glucan catabolic process	GO_0009251	20	-0.343169	-0.909505	0.978371	882
Regulation of catalytic activity	GO_0050790	60	-0.273906	-0.911761	0.979166	12408
Cellular glucose homeostasis	GO_0001678	25	-0.317703	-0.90123	0.979486	2462
Tissue development	GO_0009888	12	-0.390671	-0.910667	0.979654	6867
Telomere maintenance	GO_0000723	10	-0.411305	-0.913123	0.980077	13246
Cell growth	GO_0016049	57	-0.282424	-0.912118	0.980394	10911
Ubiquitin-dependent glycoprotein erad pathway	GO_0097466	13	-0.39026	-0.913193	0.981944	8654
Floral organ development	GO_0048437	13	-0.380833	-0.913955	0.982149	2126
Floral organ abscission	GO_0010227	10	-0.412123	-0.919066	0.982213	2599
Inorganic anion transport	GO_0015698	13	-0.381132	-0.914429	0.983021	4755
Response to oxygen-containing compound	GO_1901700	18	-0.359321	-0.93068	0.983171	15237
Zinc ii ion transmembrane transport	GO_0071577	47	-0.28897	-0.921158	0.983367	4875
Golgi vesicle budding	GO_0048194	20	-0.3608	-0.928958	0.983369	9149
Regulation of translation	GO_0006417	11	-0.405768	-0.921991	0.983396	5697
Steroid biosynthetic process	GO_0006694	25	-0.333821	-0.927958	0.983752	584
Chloroplast organization	GO_0009658	111	-0.2526	-0.923516	0.983855	6108
Ammonia assimilation cycle	GO_0019676	15	-0.371661	-0.916597	0.984044	14259
Cytoplasmic microtubule organization	GO_0031122	56	-0.279003	-0.915647	0.984181	13314
Negative regulation of catalytic activity	GO_0043086	115	-0.248761	-0.919101	0.98421	6732
Type i hypersensitivity	GO_0016068	5	-0.495886	-0.914728	0.984386	2348
Macroautophagy	GO_0016236	5	-0.501723	-0.917211	0.984751	9939
Cytochrome complex assembly	GO_0017004	7	-0.452967	-0.92212	0.985217	11685
Retrograde transport endosome to golgi	GO_0042147	56	-0.284531	-0.929043	0.985274	10400
Protein export from nucleus	GO_0006611	17	-0.353622	-0.919482	0.985424	1757
Regulation of production of sirna involved in chromatin silencing by small rna	GO_0070921	5	-0.497968	-0.923697	0.985526	6934
Reciprocal meiotic recombination	GO_0007131	33	-0.290191	-0.865473	0.986116	1684
Negative regulation of defense response	GO_0031348	17	-0.346723	-0.897223	0.986657	6355
Protein insertion into er membrane	GO_0045048	9	-0.425143	-0.924969	0.986741	1847
Rrna modification	GO_0000154	7	-0.442876	-0.924026	0.986904	8140
Sterol biosynthetic process	GO_0016126	32	-0.319794	-0.92564	0.987223	3087
Xanthine catabolic process	GO_0009115	13	-0.37631	-0.891575	0.987864	4692
Sexual reproduction	GO_0019953	5	-0.462339	-0.865522	0.98788	5177
Response to light intensity	GO_0009642	8	-0.423178	-0.890523	0.988369	3714
Single-organism transport	GO_0044765	16	-0.349284	-0.891877	0.989186	7500
Glycolytic process	GO_0006096	172	-0.22243	-0.866516	0.989422	8771
Electron transport chain	GO_0022900	41	-0.285013	-0.871794	0.989479	2170
Protein transport to vacuole involved in ubiquitin-dependent protein catabolic process via the multivesicular body sorting pathway	GO_0043328	14	-0.359723	-0.865592	0.989587	6023
Udp-l-arabinose biosynthetic process	GO_0033358	5	-0.469975	-0.89344	0.989627	13424
Protein exit from endoplasmic reticulum	GO_0032527	8	-0.41625	-0.876093	0.989679	10280
Geranyl diphosphate biosynthetic process	GO_0033384	8	-0.427428	-0.894159	0.989878	4370
Specification of floral organ number	GO_0048833	22	-0.330076	-0.876873	0.989938	6246
Seed development	GO_0048316	29	-0.305735	-0.875059	0.989946	7640
Regulation of sequence-specific dna binding transcription factor activity	GO_0051090	7	-0.420174	-0.867124	0.990073	6044
Hexose transmembrane transport	GO_0035428	36	-0.296722	-0.87764	0.990094	6394
Maturation of lsu-rrna from tricistronic rrna transcript	SSU-RRNA_5.8S_RRNA_LSU-RRNA_	24	-0.32491	-0.892259	0.990293	4408
Positive regulation of defense response	GO_0031349	9	-0.405779	-0.867854	0.990323	9303
Single-organism developmental process	GO_0044767	27	-0.304025	-0.87205	0.990809	9075
Pseudouridine synthesis	GO_0001522	28	-0.31574	-0.894361	0.991388	13786
Histone h3-k36 demethylation	GO_0070544	7	-0.426033	-0.877769	0.991747	7571
Negative regulation of biological process	GO_0048519	7	-0.432446	-0.868927	0.991752	7200
Regulation of flower development	GO_0009909	57	-0.267213	-0.869756	0.991785	11772
Mrna export from nucleus	GO_0006406	26	-0.318385	-0.881168	0.991902	1757
Cytokinesis	GO_0000910	27	-0.308863	-0.867997	0.991928	12273
Phloem sucrose loading	GO_0009915	7	-0.435736	-0.88359	0.992394	1006
Transcytosis	GO_0045056	8	-0.41625	-0.881763	0.992555	10280
Nuclear-transcribed mrna catabolic process deadenylation-dependent decay	GO_0000288	41	-0.281383	-0.872084	0.992648	7185
Arp2/3 complex-mediated actin nucleation	GO_0034314	16	-0.352168	-0.882397	0.993046	5191
Positive regulation of long-day photoperiodism flowering	GO_0048578	18	-0.343199	-0.877944	0.993275	456
Nls-bearing protein import into nucleus	GO_0006607	56	-0.266492	-0.872557	0.993577	5314
Dna endoreduplication	GO_0042023	14	-0.368321	-0.879458	0.993676	2267
Integument development	GO_0080060	5	-0.469053	-0.878498	0.993879	12862
Transcription from rna polymerase i promoter	GO_0006360	29	-0.305912	-0.883677	0.99417	17690
Cellular macromolecule metabolic process	GO_0044260	29	-0.313252	-0.886149	0.994409	7200
Determination of dorsal identity	GO_0048263	5	-0.469053	-0.884378	0.994519	12862
Histone acetylation	GO_0016573	70	-0.259537	-0.886483	0.995635	6601
Capsule polysaccharide biosynthetic process	GO_0045227	5	-0.469975	-0.860054	0.995689	13424
Peptide metabolic process	GO_0006518	17	-0.345552	-0.884397	0.996458	10042
Histone h3-k36 methylation	GO_0010452	11	-0.379921	-0.858491	0.997246	7571
Gametophyte development	GO_0048229	14	-0.355962	-0.857368	0.99784	2718
Karyogamy	GO_0000741	14	-0.354301	-0.855604	0.999776	17588
Strand invasion	GO_0042148	12	-0.148067	-0.344828	0.999905	15725
Actin filament depolymerization	GO_0030042	14	-0.327374	-0.779676	1	4560
Actin filament reorganization	GO_0090527	6	-0.379278	-0.729469	1	7406
Activation of mapkk activity	GO_0000186	96	-0.233703	-0.832135	1	6604
Activation of protein kinase activity	GO_0032147	6	-0.29522	-0.573253	1	10260
Alkaloid metabolic process	GO_0009820	20	-0.292978	-0.765532	1	6589
Anion transport	GO_0006820	13	-0.283334	-0.674247	1	7931
Anther development	GO_0048653	7	-0.377506	-0.763045	1	16704
Atp hydrolysis coupled proton transport	GO_0015991	104	-0.228336	-0.836466	1	5961
Atp-dependent chromatin remodeling	GO_0043044	6	-0.362687	-0.708588	1	5019
Auxin polar transport	GO_0009926	49	-0.185905	-0.597022	1	11019
Barrier septum assembly	GO_0000917	6	-0.357884	-0.699503	1	28917
Biotin biosynthetic process	GO_0009102	12	-0.281495	-0.659047	1	11601
Brassinosteroid mediated signaling pathway	GO_0009742	72	-0.238058	-0.806713	1	6789
Carotenoid biosynthetic process	GO_0016117	47	-0.270878	-0.844517	1	10171
Cdp-choline pathway	GO_0006657	8	-0.317045	-0.661015	1	10339
Cell communication	GO_0007154	7	-0.292262	-0.575305	1	6353
Cell death	GO_0008219	10	-0.3498	-0.787342	1	5514
Cell fate specification	GO_0001708	25	-0.297061	-0.826337	1	6246
Cell plate formation involved in plant-type cell wall biogenesis	GO_0009920	9	-0.263833	-0.575051	1	10639
Cell proliferation	GO_0008283	24	-0.236862	-0.657989	1	2283
Cellular amino acid biosynthetic process	GO_0008652	22	-0.30334	-0.823958	1	10407
Cellular calcium ion homeostasis	GO_0006874	15	-0.259307	-0.648552	1	11663
Cellular carbohydrate metabolic process	GO_0044262	9	-0.302221	-0.65596	1	31424
Cellular iron ion homeostasis	GO_0006879	13	-0.253445	-0.613143	1	17254
Cellular potassium ion homeostasis	GO_0030007	10	-0.318817	-0.694948	1	14318
Cellular protein modification process	GO_0006464	41	-0.248243	-0.749635	1	9814
Cellular response to dna damage stimulus	GO_0006974	13	-0.348195	-0.817758	1	17157
Centromere complex assembly	GO_0034508	5	-0.403185	-0.755261	1	26877
Ceramide biosynthetic process	GO_0046513	5	-0.39824	-0.721031	1	5744
Chlorophyll biosynthetic process	GO_0015995	34	-0.270929	-0.801533	1	12868
Chlorophyll catabolic process	GO_0015996	22	-0.257844	-0.688087	1	13060
Cholesterol biosynthetic process	GO_0006695	5	-0.409697	-0.746405	1	2639
Choline transport	GO_0015871	5	-0.360048	-0.655085	1	13140
Chromatin silencing	GO_0006342	25	-0.204254	-0.561226	1	1480
Chromosome organization	GO_0051276	16	-0.168219	-0.422197	1	37381
Chromosome segregation	GO_0007059	21	-0.322362	-0.84911	1	6464
Coenzyme a biosynthetic process	GO_0015937	14	-0.254002	-0.615053	1	12233
Cristae formation	GO_0042407	7	-0.367474	-0.753909	1	15937
Cytoplasmic translation	GO_0002181	87	-0.162888	-0.580573	1	16874
Cytoplasmic translational termination	GO_0002184	14	-0.246479	-0.606666	1	5783
De novo pyrimidine nucleobase biosynthetic process	GO_0006207	28	-0.221535	-0.626844	1	15111
De novo ump biosynthetic process	GO_0044205	6	-0.405213	-0.798102	1	11750
Deadenylation-dependent decapping of nuclear-transcribed mrna	GO_0000290	26	-0.20818	-0.578072	1	11771
Defense response to other organism	GO_0098542	34	-0.226706	-0.682635	1	9652
Dephosphorylation of rna polymerase ii c-terminal domain	GO_0070940	8	-0.400601	-0.84453	1	7036
Detection of calcium ion	GO_0005513	6	-0.37283	-0.712369	1	8726
Developmental growth	GO_0048589	20	-0.247541	-0.660754	1	13217
Dna recombinase assembly	GO_0000730	7	-0.224042	-0.449092	1	10931
Dna recombination	GO_0006310	37	-0.209369	-0.63097	1	15426
Double-strand break repair via nonhomologous end joining	GO_0006303	10	-0.341234	-0.764753	1	8985
Embryo development ending in seed dormancy	GO_0009793	217	-0.200352	-0.808823	1	5733
Embryonic axis specification	GO_0000578	7	-0.309173	-0.632536	1	16514
Endonucleolytic cleavage in its1 to separate ssu-rrna from 5.8s rrna and lsu-rrna from tricistronic rrna transcript	SSU-RRNA_5.8S_RRNA_LSU-RRNA_	7	-0.240215	-0.488575	1	14339
Endoplasmic reticulum organization	GO_0007029	13	-0.261868	-0.628161	1	2712
Endosome transport via multivesicular body sorting pathway	GO_0032509	5	-0.393604	-0.742388	1	4509
Ent-kaurene oxidation to kaurenoic acid	GO_0010241	5	-0.415497	-0.776327	1	1728
Error-prone translesion synthesis	GO_0042276	5	-0.263488	-0.493647	1	5108
Establishment of planar polarity	GO_0001736	8	-0.294151	-0.629587	1	10838
Ethylene-activated signaling pathway	GO_0009873	23	-0.239195	-0.669729	1	6509
Farnesyl diphosphate biosynthetic process	GO_0045337	10	-0.373754	-0.830293	1	6127
Fatty acid beta-oxidation unsaturated even number	GO_0033542	8	-0.38827	-0.823742	1	3722
Fatty acid beta-oxidation using acyl-coa dehydrogenase	GO_0033539	27	-0.252082	-0.718568	1	13749
Fructose 26-bisphosphate metabolic process	GO_0006003	9	-0.304528	-0.649938	1	9869
Fructose 6-phosphate metabolic process	GO_0006002	38	-0.228514	-0.69535	1	13996
Fructose metabolic process	GO_0006000	9	-0.304528	-0.642334	1	9869
Gibberellin biosynthetic process	GO_0009686	9	-0.296891	-0.641555	1	1728
Gibberellin catabolic process	GO_0045487	5	-0.413347	-0.759173	1	7370
Glucose 6-phosphate metabolic process	GO_0051156	21	-0.270823	-0.732776	1	10723
Glucosylceramide catabolic process	GO_0006680	16	-0.286939	-0.730935	1	7315
Glutathione biosynthetic process	GO_0006750	6	-0.256536	-0.49788	1	33480
Glyceraldehyde-3-phosphate biosynthetic process	GO_0046166	7	-0.257987	-0.535748	1	13928
Glycerol catabolic process	GO_0019563	16	-0.189379	-0.472619	1	17521
Glycerol-3-phosphate biosynthetic process	GO_0046167	7	-0.312026	-0.642315	1	9898
Glycine biosynthetic process	GO_0006545	10	-0.374533	-0.835158	1	9987
Glycolipid biosynthetic process	GO_0009247	16	-0.248925	-0.607064	1	1117
Glycolipid translocation	GO_0034203	6	-0.405075	-0.791403	1	10142
Glycolipid transport	GO_0046836	7	-0.385718	-0.760373	1	5514
Glycyl-trna aminoacylation	GO_0006426	7	-0.291024	-0.597255	1	19032
Golgi to plasma membrane protein transport	GO_0043001	11	-0.234685	-0.53677	1	14647
Golgi to vacuole transport	GO_0006896	27	-0.208557	-0.589815	1	9954
Gravitropism	GO_0009630	18	-0.287901	-0.740084	1	11775
Group ii intron splicing	GO_0000373	6	-0.385975	-0.759944	1	18762
Guanosine tetraphosphate metabolic process	GO_0015969	12	-0.207532	-0.477947	1	10023
Heme biosynthetic process	GO_0006783	5	-0.351789	-0.646273	1	9981
Heme o biosynthetic process	GO_0048034	5	-0.22166	-0.424867	1	35050
Histone h3 acetylation	GO_0043966	7	-0.315757	-0.637154	1	30814
Histone methylation	GO_0016571	11	-0.311278	-0.699728	1	13254
Histone ubiquitination	GO_0016574	13	-0.315132	-0.767934	1	8608
Hyperosmotic salinity response	GO_0042538	37	-0.203325	-0.609224	1	2169
Indole glucosinolate metabolic process	GO_0042343	15	-0.334742	-0.833515	1	2423
Induced systemic resistance jasmonic acid mediated signaling pathway	GO_0009864	13	-0.288276	-0.6755	1	10424
Innate immune response	GO_0045087	13	-0.322746	-0.775029	1	8823
Integrin-mediated signaling pathway	GO_0007229	6	-0.436346	-0.836693	1	17985
Interphase microtubule nucleation by interphase microtubule organizing center	GO_0051415	10	-0.229888	-0.500851	1	12875
Jasmonic acid metabolic process	GO_0009694	7	-0.352329	-0.708021	1	9151
Late nucleophagy	GO_0044805	10	-0.295298	-0.655373	1	31736
Leucine biosynthetic process	GO_0009098	7	-0.368442	-0.751809	1	13274
Leucyl-trna aminoacylation	GO_0006429	9	-0.212128	-0.463877	1	35480
Lipid catabolic process	GO_0016042	72	-0.225847	-0.777368	1	8949
Lipid homeostasis	GO_0055088	28	-0.234056	-0.656865	1	13749
Lipoate biosynthetic process	GO_0009107	8	-0.252971	-0.538235	1	33641
L-methionine salvage from s-adenosylmethionine	GO_0019284	19	-0.320784	-0.841263	1	14434
L-phenylalanine biosynthetic process	GO_0009094	14	-0.268608	-0.653548	1	2466
L-proline biosynthetic process	GO_0055129	6	-0.377364	-0.726116	1	14714
Lysyl-trna aminoacylation	GO_0006430	18	-0.303089	-0.784088	1	12138
Maltose metabolic process	GO_0000023	12	-0.275881	-0.64433	1	4425
Mannosylation	GO_0097502	25	-0.227202	-0.631593	1	9152
Meiotic cell cycle	GO_0007126	13	-0.306785	-0.723909	1	12875
Meiotic sister chromatid cohesion	GO_0051177	5	-0.403185	-0.738068	1	26877
Microtubule cytoskeleton organization	GO_0000226	39	-0.239661	-0.738826	1	7631
Mismatch repair	GO_0006298	19	-0.328139	-0.831904	1	1746
Mitochondrial fusion	GO_0008053	6	-0.293606	-0.558922	1	31811
Mitochondrial protein processing	GO_0034982	6	-0.293606	-0.577082	1	31811
Mitochondrial respiratory chain complex iv assembly	GO_0033617	13	-0.326902	-0.78852	1	12229
Mitochondrial translation	GO_0032543	13	-0.250511	-0.597294	1	33753
Mitotic cell cycle	GO_0007067	23	-0.278426	-0.765413	1	9410
Mitotic spindle assembly	GO_0090307	10	-0.229888	-0.521721	1	12875
Mitotic spindle assembly checkpoint	GO_0007094	15	-0.308994	-0.761788	1	12735
Mo-molybdopterin cofactor biosynthetic process	GO_0006777	15	-0.241644	-0.601228	1	13918
Monoterpenoid biosynthetic process	GO_0016099	6	-0.344737	-0.660588	1	6787
Mrna 3 -splice site recognition	GO_0000389	7	-0.392187	-0.799385	1	4931
Mrna cleavage	GO_0006379	17	-0.198178	-0.495708	1	15655
Mrna polyadenylation	GO_0006378	26	-0.224614	-0.634246	1	15655
Mrna processing	GO_0006397	108	-0.193615	-0.705655	1	9841
Mrna splice site selection	GO_0006376	23	-0.182573	-0.488185	1	5584
Myo-inositol transport	GO_0015798	10	-0.385327	-0.850058	1	5249
Nad metabolic process	GO_0019674	5	-0.356477	-0.649822	1	6305
Negative regulation of cellular process	GO_0048523	10	-0.290702	-0.644573	1	8976
Negative regulation of defense response to bacterium	GO_1900425	6	-0.217487	-0.418209	1	4717
Negative regulation of microtubule depolymerization	GO_0007026	8	-0.349378	-0.743578	1	12742
Negative regulation of transcription from rna polymerase ii promoter	GO_0000122	13	-0.191154	-0.453843	1	36425
Negative regulation of translation	GO_0017148	23	-0.210464	-0.571503	1	14347
Negative regulation of translational elongation	GO_0045900	6	-0.273571	-0.528423	1	32713
Nitrogen compound transport	GO_0071705	5	-0.274548	-0.512045	1	5048
Nitrogen utilization	GO_0019740	8	-0.326226	-0.682286	1	30343
N-terminal peptidyl-methionine acetylation	GO_0017196	11	-0.233062	-0.527751	1	34538
Nuclear mrna surveillance	GO_0071028	7	-0.199725	-0.405919	1	36038
Nucleic acid metabolic process	GO_0090304	16	-0.325041	-0.80705	1	8976
Nucleotide phosphorylation	GO_0046939	33	-0.242178	-0.711826	1	3588
Oligosaccharide-lipid intermediate biosynthetic process	GO_0006490	7	-0.26538	-0.537337	1	9843
Pattern specification process	GO_0007389	10	-0.206049	-0.471801	1	6867
Pectin biosynthetic process	GO_0045489	46	-0.265791	-0.82864	1	4188
Pentose catabolic process	GO_0019323	9	-0.302221	-0.658555	1	31424
Pentose-phosphate shunt	GO_0006098	49	-0.227711	-0.746538	1	9715
Pentose-phosphate shunt non-oxidative branch	GO_0009052	22	-0.313069	-0.823648	1	4606
Peptidyl-diphthamide biosynthetic process from peptidyl-histidine	GO_0017183	7	-0.224201	-0.455667	1	34936
Peptidyl-lysine modification to peptidyl-hypusine	GO_0008612	8	-0.25442	-0.519145	1	17881
Peptidyl-lysine monomethylation	GO_0018026	14	-0.311691	-0.758742	1	7619
Phosphatidylinositol-mediated signaling	GO_0048015	12	-0.154058	-0.36514	1	11789
Photorespiration	GO_0009853	26	-0.268603	-0.762718	1	12796
Piecemeal microautophagy of nucleus	GO_0034727	10	-0.295298	-0.644936	1	31736
Plastid organization	GO_0009657	11	-0.371882	-0.847484	1	10485
Pollen germination	GO_0009846	29	-0.247001	-0.696793	1	2633
Pollen maturation	GO_0010152	12	-0.180932	-0.407555	1	36885
Pollen tube guidance	GO_0010183	13	-0.349443	-0.831033	1	9256
Poly	A+_MRNA_EXPORT_FROM_NUCLEUS_	17	-0.301312	-0.762159	1	12130
Polyamine transmembrane transport	GO_1902047	11	-0.317792	-0.740662	1	3989
Positive regulation of atpase activity	GO_0032781	7	-0.391756	-0.786509	1	5298
Positive regulation of circadian rhythm	GO_0042753	15	-0.239811	-0.59885	1	14459
Positive regulation of histone acetylation	GO_0035066	12	-0.336717	-0.789856	1	9564
Positive regulation of protein phosphorylation	GO_0001934	5	-0.331181	-0.617605	1	8075
Positive regulation of systemic acquired resistance	GO_1901672	8	-0.388379	-0.819958	1	6661
Positive regulation of transcription elongation from rna polymerase ii promoter	GO_0032968	10	-0.274137	-0.605236	1	15471
Positive regulation of transcription factor catabolic process	GO_1901485	6	-0.217487	-0.428312	1	4717
Prolyl-trna aminoacylation	GO_0006433	11	-0.281205	-0.640348	1	4362
Proteasome regulatory particle assembly	GO_0070682	8	-0.336233	-0.711856	1	8875
Protein adp-ribosylation	GO_0006471	11	-0.215847	-0.496624	1	35313
Protein folding	GO_0006457	375	-0.167406	-0.71211	1	10284
Protein geranylgeranylation	GO_0018344	10	-0.212577	-0.469327	1	35460
Protein import into nucleus	GO_0006606	80	-0.206553	-0.716696	1	16107
Protein import into peroxisome matrix	GO_0016558	15	-0.325725	-0.803292	1	18707
Protein initiator methionine removal	GO_0070084	12	-0.264744	-0.617894	1	4327
Protein insertion into membrane	GO_0051205	10	-0.371351	-0.818542	1	13662
Protein lipoylation	GO_0009249	6	-0.25296	-0.492484	1	33641
Protein refolding	GO_0042026	15	-0.327383	-0.795922	1	11076
Protein stabilization	GO_0050821	15	-0.296523	-0.743511	1	9410
Protein transport	GO_0015031	161	-0.162853	-0.629742	1	11245
Psii associated light-harvesting complex ii catabolic process	GO_0010304	17	-0.220216	-0.560778	1	9584
Pyridoxal phosphate biosynthetic process	GO_0042823	15	-0.317397	-0.793049	1	3882
Radial pattern formation	GO_0009956	5	-0.399013	-0.743106	1	5713
Reactive oxygen species metabolic process	GO_0072593	17	-0.233318	-0.598567	1	11789
Recognition of pollen	GO_0048544	48	-0.25767	-0.830151	1	8684
Red far-red light phototransduction	GO_0009585	34	-0.233412	-0.681349	1	7826
Red or far-red light signaling pathway	GO_0010017	23	-0.308034	-0.833095	1	5109
Regulation of autophagy	GO_0010506	9	-0.288129	-0.618357	1	2712
Regulation of carbon utilization	GO_0043609	9	-0.304528	-0.658862	1	9869
Regulation of cell proliferation	GO_0042127	21	-0.304634	-0.814642	1	2609
Regulation of dna endoreduplication	GO_0032875	6	-0.380948	-0.737255	1	9740
Regulation of embryonic development	GO_0045995	8	-0.239555	-0.483382	1	34245
Regulation of ion homeostasis	GO_2000021	7	-0.296208	-0.58846	1	13611
Regulation of leaf development	GO_2000024	20	-0.280386	-0.750253	1	11589
Regulation of long-day photoperiodism flowering	GO_0048586	8	-0.388379	-0.828226	1	6661
Regulation of multicellular organismal development	GO_2000026	6	-0.361426	-0.708748	1	5801
Regulation of nucleic acid-templated transcription	GO_1903506	11	-0.319874	-0.723112	1	10626
Regulation of peroxisome size	GO_0044375	14	-0.287944	-0.710529	1	15876
Regulation of phosphorylation	GO_0042325	5	-0.442164	-0.808261	1	5590
Regulation of photomorphogenesis	GO_0010099	16	-0.207992	-0.521586	1	12313
Regulation of pollen tube growth	GO_0080092	13	-0.208764	-0.499241	1	13957
Regulation of potassium ion transport	GO_0043266	7	-0.296208	-0.589698	1	13611
Regulation of programmed cell death	GO_0043067	6	-0.430977	-0.843136	1	5489
Regulation of protein catabolic process	GO_0042176	12	-0.353701	-0.837595	1	1515
Regulation of protein kinase activity	GO_0045859	36	-0.258243	-0.775007	1	15651
Regulation of protein ubiquitination	GO_0031396	6	-0.262799	-0.529697	1	11286
Regulation of root development	GO_2000280	6	-0.390134	-0.764786	1	11401
Regulation of ruffle assembly	GO_1900027	9	-0.241946	-0.512701	1	6368
Regulation of secondary cell wall biogenesis	GO_2000652	8	-0.393868	-0.83421	1	6865
Regulation of signal transduction	GO_0009966	35	-0.17512	-0.528699	1	6748
Regulation of translational fidelity	GO_0006450	41	-0.225275	-0.698701	1	17479
Reproductive structure development	GO_0048608	7	-0.302933	-0.603316	1	10787
Response to bacterium	GO_0009617	18	-0.288754	-0.743047	1	6748
Response to cadmium ion	GO_0046686	46	-0.151317	-0.479428	1	10233
Response to chemical	GO_0042221	9	-0.25456	-0.557185	1	13694
Response to continuous far red light stimulus by the high-irradiance response system	GO_0010201	6	-0.30006	-0.599468	1	14289
Response to external stimulus	GO_0009605	13	-0.332182	-0.788062	1	1369
Response to herbicide	GO_0009635	7	-0.358815	-0.728145	1	3695
Response to ionizing radiation	GO_0010212	15	-0.266414	-0.664993	1	11693
Response to metal ion	GO_0010038	13	-0.285097	-0.68881	1	11383
Response to nitrate	GO_0010167	14	-0.347936	-0.843194	1	9000
Response to organic substance	GO_0010033	7	-0.3728	-0.761515	1	13209
Response to water deprivation	GO_0009414	131	-0.213299	-0.804574	1	11270
Ribonucleoprotein complex assembly	GO_0022618	10	-0.349397	-0.766197	1	5938
Rna	GUANINE-N7-METHYLATION_	8	-0.32956	-0.71071	1	4298
Rna export from nucleus	GO_0006405	19	-0.314792	-0.83009	1	7708
Rna phosphodiester bond hydrolysis	GO_0090501	23	-0.168865	-0.457455	1	8118
Rna phosphodiester bond hydrolysis exonucleolytic	GO_0090503	57	-0.234103	-0.784041	1	4880
Root cap development	GO_0048829	13	-0.241083	-0.569683	1	7338
Root morphogenesis	GO_0010015	5	-0.308979	-0.580539	1	6996
Sequestering of actin monomers	GO_0042989	14	-0.276414	-0.68022	1	1823
Sieve element differentiation	GO_0090603	5	-0.360048	-0.681131	1	13140
Simple leaf morphogenesis	GO_0060776	7	-0.387899	-0.768128	1	4540
Single-multicellular organism process	GO_0044707	8	-0.254343	-0.545711	1	5872
Specification of floral organ identity	GO_0010093	30	-0.269722	-0.774202	1	8279
Spindle assembly	GO_0051225	13	-0.280103	-0.655153	1	7993
Spliceosomal snrnp assembly	GO_0000387	21	-0.204961	-0.551239	1	16789
Srp-dependent cotranslational protein targeting to membrane translocation	GO_0006616	6	-0.273571	-0.526536	1	32713
Stomatal movement	GO_0010118	18	-0.229917	-0.601459	1	16607
Telomere tethering at nuclear periphery	GO_0034398	5	-0.453665	-0.841138	1	15669
Terpenoid biosynthetic process	GO_0016114	39	-0.260836	-0.800954	1	5471
Transcription from rna polymerase iii promoter	GO_0006383	27	-0.258972	-0.733774	1	17607
Translational termination	GO_0006415	39	-0.261347	-0.794971	1	12206
Trichome morphogenesis	GO_0010090	24	-0.262536	-0.723001	1	7587
Triglyceride metabolic process	GO_0006641	6	-0.318971	-0.632083	1	9898
Trna aminoacylation for protein translation	GO_0006418	13	-0.263385	-0.624459	1	5270
Trna modification	GO_0006400	46	-0.214244	-0.678563	1	6693
Tyrosine biosynthetic process	GO_0006571	9	-0.37927	-0.81743	1	1935
Ubiquitin-dependent protein catabolic process via the n-end rule pathway	GO_0071596	5	-0.257738	-0.483073	1	12968
Udp-n-acetylglucosamine metabolic process	GO_0006047	8	-0.270452	-0.585159	1	32854
Unidimensional cell growth	GO_0009826	69	-0.219657	-0.746531	1	6211
Urea catabolic process	GO_0043419	5	-0.341625	-0.617358	1	10006
Urea cycle	GO_0000050	12	-0.353161	-0.81729	1	13354
Vacuolar transport	GO_0007034	23	-0.203483	-0.546008	1	6349
Valyl-trna aminoacylation	GO_0006438	21	-0.256999	-0.698394	1	9220
Vesicle fusion with golgi apparatus	GO_0048280	30	-0.279818	-0.82062	1	10280
Vitamin b6 biosynthetic process	GO_0042819	5	-0.42271	-0.794227	1	3882
Xylem and phloem pattern formation	GO_0010051	34	-0.273146	-0.819744	1	10647
Xylem development	GO_0010089	14	-0.304546	-0.747398	1	6865

## Sheet: KEGG Enrichment (style)
No.	Pathway	Candidate genes with pathway annotation	All genes with pathway annotation	p-value	Q-value	Pathway ID
1	Plant hormone signal transduction	25	329	0.000678	0.0278	ko04075
2	Carbon metabolism	2	5	0.013929	0.285542	ko01200
3	Nucleotide excision repair	7	75	0.025356	0.346533	ko03420
4	Citrate cycle (TCA cycle)	1	1	0.038938	0.371239	ko00020
5	Biosynthesis of secondary metabolites	2	9	0.045273	0.371239	ko01110
6	Pyruvate metabolism	1	2	0.076371	0.391401	ko00620
7	Propanoate metabolism	1	2	0.076371	0.391401	ko00640
8	Nitrogen metabolism	1	2	0.076371	0.391401	ko00910
9	Fatty acid biosynthesis	1	3	0.112356	0.460662	ko00061
10	Fatty acid metabolism	1	3	0.112356	0.460662	ko01212
11	ABC transporters	2	17	0.139981	0.50208	ko02010
12	Thiamine metabolism	1	4	0.14695	0.50208	ko00730
13	Photosynthesis - antenna proteins	2	19	0.167552	0.528433	ko00196
14	Autophagy - other eukaryotes	4	58	0.187863	0.550169	ko04136
15	Metabolic pathways	13	258	0.201316	0.550263	ko01100
16	Plant-pathogen interaction	8	162	0.294709	0.697866	ko04626
17	Lysine degradation	1	9	0.300842	0.697866	ko00310
18	Phagosome	8	164	0.30638	0.697866	ko04145
19	mRNA surveillance pathway	10	223	0.368386	0.749837	ko03015
20	Mismatch repair	2	33	0.370267	0.749837	ko03430
21	Photosynthesis	3	57	0.384063	0.749837	ko00195
22	Proteasome	4	85	0.423925	0.790042	ko03050
23	DNA replication	1	16	0.471071	0.839735	ko03030
24	RNA polymerase	2	43	0.504247	0.861422	ko03020
25	Basal transcription factors	3	75	0.565253	0.89136	ko03022
26	SNARE interactions in vesicular transport	3	75	0.565253	0.89136	ko04130
27	Oxidative phosphorylation	5	149	0.698386	0.917881	ko00190
28	Various types of N-glycan biosynthesis	1	31	0.709688	0.917881	ko00513
29	Ubiquitin mediated proteolysis	2	64	0.720048	0.917881	ko04120
30	N-Glycan biosynthesis	1	33	0.73206	0.917881	ko00510
31	Protein processing in endoplasmic reticulum	10	307	0.7711	0.917881	ko04141
32	RNA degradation	3	104	0.779369	0.917881	ko03018
33	Circadian rhythm - plant	3	106	0.790336	0.917881	ko04712
34	Ribosome	14	426	0.793152	0.917881	ko03010
35	Peroxisome	1	41	0.805681	0.917881	ko04146
36	Ribosome biogenesis in eukaryotes	3	109	0.805944	0.917881	ko03008
37	RNA transport	10	326	0.831608	0.921511	ko03013
38	Protein export	1	72	0.944456	0.995122	ko03060
39	Endocytosis	5	241	0.964491	0.995122	ko04144
40	MAPK signaling pathway - plant	1	102	0.983656	0.995122	ko04016
41	Spliceosome	7	384	0.995122	0.995122	ko03040

## Sheet: ko04075
DEGs involved in the significantly enriched pathway "Plant hormone signal transduction"
K_id	DEGs	Gene name	Description
K14499	Gt_12638	BKI1	BRI1 kinase inhibitor 1
K09587	Gt_65179	DWF4	Cytochrome P450 90B1 (Dwarf 4)
K14503	Gt_67476	BZR1	brassinosteroid resistant 1
K14488	Gt_53344	SAUR15 (SAUR-AC1)	SAUR-like protein 15
K14488	Gt_24237	SAUR	SAUR-like protein
K14484	Gt_15651	IAA7	auxin-responsive protein IAA7
K14484	Gt_33696	IAA26	auxin-responsive protein IAA26
K13946	Gt_6838	LAX2	auxin influx carrier LAX2-like
K14484	Gt_47484	AUX22	auxin-induced protein AUX22
K12126	Gt_81870	PIF3	phytochrome-interacting factor 3
K13464	Gt_26985	JAZ	jasmonate ZIM domain-containing protein
K14431	Gt_59843	TGA	transcription factor TGA
K14516	Gt_35856	ERF1	ethylene-responsive transcription factor 1
K14487	Gt_66577	GH3	auxin responsive GH3 gene family
K14491	Gt_57534	ARR-B	two-component response regulator ARR-B family
