# Supplementary material for: Comprehensive transcriptomic profiling reveals complex molecular mechanisms in the regulation of style-length dimorphism in Guettarda speciosa (Rubiaceae), a species with “anomalous” distyly
Source: Front Plant Sci. 2023 Mar 16;14:1116078. doi: 10.3389/fpls.2023.1116078 (PMC10060554; doi:10.3389/fpls.2023.1116078)
Supplement: Supplementary file 8 [file Table_3.xlsx]

## Sheet: GO Enrichment (floral tube)
NAME	GO ID	SIZE	ES	NES	Q-value	RANK AT MAX
Cytoplasmic mRNA processing body assembly	GO_0033962	14	0.547096	1.61064	0.767544	15458
Protein insertion into membrane	GO_0051205	10	0.597895	1.54861	0.780492	14807
Response to red or far red light	GO_0009639	10	0.576143	1.49383	0.78968	2217
Photosystem ii repair	GO_0010206	26	0.46806	1.54142	0.791852	11134
Response to red light	GO_0010114	27	0.438572	1.52937	0.800638	6827
Acropetal auxin transport	GO_0010541	12	0.59442	1.5031	0.810148	2942
Plant ovule development	GO_0048481	59	0.378128	1.49395	0.813326	4628
Nucleoside diphosphate phosphorylation	GO_0006165	18	0.544662	1.54908	0.814381	7199
Basipetal auxin transport	GO_0010540	22	0.563824	1.61197	0.821179	2942
Starch biosynthetic process	GO_0019252	51	0.419027	1.5309	0.8236	5586
Sulfur compound metabolic process	GO_0006790	11	0.596473	1.50455	0.828458	1679
Vesicle organization	GO_0016050	21	0.465255	1.49566	0.829017	2432
Translational termination	GO_0006415	39	0.420492	1.47821	0.829424	9143
Regulation of response to stimulus	GO_0048583	12	0.61964	1.47317	0.833846	10605
Spliceosomal tri-snrnp complex assembly	GO_0000244	10	0.576686	1.4173	0.834473	4582
Formation of animal organ boundary	GO_0010160	11	0.609309	1.46399	0.841164	2942
Mo-molybdopterin cofactor biosynthetic process	GO_0006777	15	0.50042	1.51242	0.842252	12412
Response to blue light	GO_0009637	51	0.350875	1.41886	0.84259	10420
Positive regulation of proteasomal ubiquitin-dependent protein catabolic process	GO_0032436	37	0.404035	1.45966	0.844102	7377
Response to far red light	GO_0010218	41	0.420847	1.51723	0.844299	6728
Chloride transport	GO_0006821	36	0.420162	1.47882	0.848909	8394
Lipid transport	GO_0006869	58	0.35839	1.5058	0.850747	6498
Utp biosynthetic process	GO_0006228	19	0.544659	1.54909	0.8551	7199
Adp transport	GO_0015866	15	0.549487	1.42598	0.856106	5758
Pollen exine formation	GO_0010584	19	0.498617	1.46509	0.858174	8160
Proline biosynthetic process	GO_0006561	15	0.537942	1.41014	0.858263	6458
Atp transport	GO_0015867	16	0.524354	1.41896	0.858864	5758
Pyrimidine nucleotide biosynthetic process	GO_0006221	14	0.577906	1.4278	0.864468	10351
Specification of floral organ identity	GO_0010093	34	0.462389	1.5818	0.867452	4628
Negative regulation of cell death	GO_0060548	16	0.552042	1.63586	0.86902	12661
Sugar mediated signaling pathway	GO_0010182	30	0.419617	1.39053	0.869201	10436
Cysteine biosynthetic process from serine	GO_0006535	16	0.468173	1.39635	0.869803	10113
Specification of floral organ number	GO_0048833	23	0.544164	1.61464	0.873278	4628
Secondary metabolic process	GO_0019748	26	0.439877	1.41923	0.875242	9729
Positive regulation of biological process	GO_0048518	20	0.493226	1.39218	0.875447	12102
Gynoecium development	GO_0048467	10	0.606361	1.43194	0.878192	3281
Regulation of seedling development	GO_1900140	10	0.568197	1.42826	0.880089	2749
Photoperiodism flowering	GO_0048573	16	0.44361	1.4001	0.880111	3098
Positive regulation of flower development	GO_0009911	40	0.361098	1.40286	0.88224	4110
Regulation of transcription from rna polymerase ii promoter	GO_0006357	117	0.333392	1.39671	0.88295	7828
Plant-type hypersensitive response	GO_0009626	14	0.50367	1.38367	0.89049	12163
3 -phospho-5 -adenylyl sulfate transmembrane transport	GO_1902559	12	0.624196	1.43265	0.893988	8268
Negative regulation of transcription from rna polymerase ii promoter	GO_0000122	13	0.593714	1.37909	0.899241	8355
Ctp biosynthetic process	GO_0006241	19	0.544659	1.54909	0.900106	7199
Endosomal transport	GO_0016197	15	0.508287	1.43749	0.908145	5452
Glutamyl-trna aminoacylation	GO_0006424	18	0.517542	1.62061	0.910053	10156
Pollen germination	GO_0009846	29	0.404178	1.43292	0.913096	2667
Cell fate specification	GO_0001708	26	0.531875	1.58369	0.91532	4628
Response to zinc ion	GO_0010043	24	0.610096	1.76608	0.917179	6169
Histone deacetylation	GO_0016575	16	0.632336	1.43846	0.925056	9870
Floral organ development	GO_0048437	13	0.535535	1.44203	0.925082	7850
Rna polymerase ii transcriptional preinitiation complex assembly	GO_0051123	17	0.528745	1.55708	0.941392	6947
Gtp biosynthetic process	GO_0006183	19	0.544659	1.54909	0.950111	7199
Terpenoid biosynthetic process	GO_0016114	42	0.337029	0.862489	0.953818	6452
Vasculature development	GO_0001944	27	0.265567	0.838802	0.954391	12773
Protein tetramerization	GO_0051262	11	0.343806	0.839503	0.955534	1735
Queuosine biosynthetic process	GO_0008616	15	0.383612	0.862701	0.955992	15805
Negative gravitropism	GO_0009959	16	0.33422	0.842574	0.956631	7665
Protein urmylation	GO_0032447	10	0.402479	0.853613	0.956759	5298
Protein processing	GO_0016485	96	0.207275	0.839904	0.957127	2337
Positive regulation of translational termination	GO_0045905	12	0.321157	0.863231	0.957479	4330
Sucrose metabolic process	GO_0005985	57	0.2674	0.835875	0.957506	10952
Glucose import	GO_0046323	139	0.219907	0.81265	0.957796	10123
Farnesyl diphosphate biosynthetic process	GO_0045337	11	0.303223	0.810108	0.958005	9152
Rna polyadenylation	GO_0043631	13	0.326416	0.834298	0.958086	18837
Protein initiator methionine removal	GO_0070084	12	0.289802	0.854189	0.958148	12925
Uracil catabolic process	GO_0006212	16	0.285864	0.842773	0.958717	13444
Protein geranylgeranylation	GO_0018344	10	0.340867	0.840313	0.958752	5895
Purine nucleoside catabolic process	GO_0006152	11	0.373214	0.808103	0.959138	12593
Regulation of pollen tube growth	GO_0080092	13	0.25914	0.810497	0.959626	11781
Glucose transmembrane transport	GO_1904659	106	0.226723	0.812768	0.959911	11231
Translational frameshifting	GO_0006452	12	0.321157	0.863231	0.960046	4330
Detection of brassinosteroid stimulus	GO_0009729	14	0.308625	0.85434	0.960359	3446
Tubulin complex assembly	GO_0007021	12	0.354214	0.843163	0.960404	11832
Chloroplast organization	GO_0009658	111	0.221949	0.848087	0.960694	11134
S-adenosylmethioninamine biosynthetic process	GO_0006557	22	0.269756	0.850558	0.960734	10636
Single-organism process	GO_0044699	74	0.205553	0.849337	0.960784	10228
Glycolytic process	GO_0006096	174	0.20449	0.857811	0.960855	8819
Mitotic spindle assembly checkpoint	GO_0007094	15	0.301361	0.856621	0.960937	4616
Sister chromatid cohesion	GO_0007062	10	0.317708	0.855335	0.96095	12737
Megagametogenesis	GO_0009561	15	0.307243	0.843865	0.961459	1714
Chloroplast avoidance movement	GO_0009903	29	0.313318	0.846358	0.961483	5319
Sucrose biosynthetic process	GO_0005986	18	0.304596	0.845072	0.96149	5834
Rna-dependent dna biosynthetic process	GO_0006278	14	0.300983	0.812982	0.961848	12818
Organic substance biosynthetic process	GO_1901576	10	0.33119	0.864617	0.96231	7784
Positive regulation of translational elongation	GO_0045901	12	0.321157	0.863231	0.962627	4330
Base-excision repair	GO_0006284	44	0.234482	0.814972	0.962937	6146
Regulation of macromolecule metabolic process	GO_0060255	21	0.256807	0.816094	0.963264	8449
Leucine catabolic process	GO_0006552	11	0.314289	0.8043	0.963382	6121
Nuclear-transcribed mrna catabolic process	GO_0000956	10	0.604006	1.2445	0.963726	12977
Translational initiation	GO_0006413	221	0.191074	0.813108	0.963922	9046
Carbohydrate phosphorylation	GO_0046835	94	0.222559	0.924513	0.964164	7254
Mannosylation	GO_0097502	25	0.258067	0.816741	0.964356	16213
Negative regulation of innate immune response	GO_0045824	10	0.351039	0.864848	0.964423	6101
Hydrogen ion transmembrane transport	GO_1902600	141	0.187596	0.802131	0.964704	8672
Mrna splice site selection	GO_0006376	23	0.297876	0.900622	0.964776	10720
Glycogen biosynthetic process	GO_0005978	31	0.495052	1.56158	0.964856	4346
Rna secondary structure unwinding	GO_0010501	149	0.254193	0.915262	0.965456	8046
Stomatal closure	GO_0090332	14	0.377859	0.901652	0.965496	5743
De novo pyrimidine nucleobase biosynthetic process	GO_0006207	28	0.285285	0.898935	0.965695	16469
Circadian rhythm	GO_0007623	25	0.292049	0.81701	0.966198	18331
Late endosome to vacuole transport	GO_0045324	19	0.282371	0.826147	0.966217	2667
Fatty acid beta-oxidation using acyl-coa dehydrogenase	GO_0033539	27	0.258535	0.89629	0.966303	4461
Inositol phosphate dephosphorylation	GO_0046855	12	0.337386	0.865119	0.966451	11330
Photomorphogenesis	GO_0009640	45	0.24946	0.866293	0.966473	5702
Leaf senescence	GO_0010150	48	0.222215	0.827168	0.966836	3558
Amyloplast organization	GO_0009660	13	0.392343	0.924569	0.967067	7665
Protein transmembrane transport	GO_0071806	34	0.287951	0.90342	0.96713	12781
Sodium ion transport	GO_0006814	23	0.312049	0.916953	0.967293	8678
Isopentenyl diphosphate biosynthetic process mevalonate pathway	GO_0019287	14	0.375406	0.875794	0.967387	7957
Regulation of translational fidelity	GO_0006450	42	0.292476	0.913175	0.967515	9219
Photosynthesis light harvesting in photosystem i	GO_0009768	22	0.308628	0.817473	0.967623	1797
Mapk cascade	GO_0000165	104	0.218472	0.901953	0.967663	9308
Protein ubiquitination	GO_0016567	409	0.195077	0.919153	0.967707	8483
Selenium compound metabolic process	GO_0001887	36	0.296002	0.798856	0.968095	4651
Triglyceride biosynthetic process	GO_0019432	21	0.32086	0.915286	0.968331	10881
Defense response to bacterium incompatible interaction	GO_0009816	29	0.257967	0.794761	0.968356	5568
Wnt signaling pathway	GO_0016055	93	0.233902	0.917621	0.968584	14191
Spermine biosynthetic process	GO_0006597	24	0.278513	0.86786	0.968603	10826
Cell death	GO_0008219	10	0.285851	0.866528	0.96863	13584
Peptidyl-serine phosphorylation	GO_0018105	219	0.19106	0.876426	0.968715	13981
Intralumenal vesicle formation	GO_0070676	15	0.326172	0.871532	0.968729	4466
Chaperone-mediated protein folding	GO_0061077	52	0.246669	0.92509	0.968864	5418
Peroxisome fission	GO_0016559	24	0.282399	0.827363	0.968897	5350
Nucleic acid phosphodiester bond hydrolysis	GO_0090305	129	0.22015	0.896375	0.968927	9181
Transcription elongation from rna polymerase ii promoter	GO_0006368	20	0.290533	0.927618	0.96895	14049
Alkaloid metabolic process	GO_0009820	20	0.291499	0.926301	0.969075	2817
Dna repair	GO_0006281	133	0.246588	0.908819	0.969126	5151
Phospholipid translocation	GO_0045332	29	0.248435	0.877489	0.969253	11852
Autophagy	GO_0006914	47	0.275352	0.796767	0.969399	10649
Nucleosome assembly	GO_0006334	70	0.26911	0.903664	0.969487	5420
Sphingolipid metabolic process	GO_0006665	14	0.329746	0.817684	0.969654	3787
Trna wobble uridine modification	GO_0002098	18	0.352894	0.919536	0.969823	18570
Nucleotide biosynthetic process	GO_0009165	14	0.360975	0.89085	0.969833	11575
Protein sumoylation	GO_0016925	36	0.229486	0.791256	0.969892	12176
Pyruvate metabolic process	GO_0006090	19	0.293188	0.889589	0.969896	1823
Cellular response to sucrose stimulus	GO_0071329	10	0.352046	0.795129	0.970037	2334
Sulfate transmembrane transport	GO_1902358	20	0.304798	0.888364	0.97008	10310
Detection of gravity	GO_0009590	11	0.482832	1.24509	0.970114	92
Root hair cell differentiation	GO_0048765	19	0.281431	0.869494	0.970364	15298
Spermidine biosynthetic process	GO_0008295	32	0.238768	0.878161	0.970563	10826
Homogalacturonan biosynthetic process	GO_0010289	19	0.36835	0.868182	0.970583	795
Srp-dependent cotranslational protein targeting to membrane	GO_0006614	30	0.313582	0.90936	0.970705	16951
Mrna processing	GO_0006397	111	0.257215	0.928129	0.97078	11307
Seed development	GO_0048316	31	0.278589	0.929261	0.97101	1930
Methylation	GO_0032259	422	0.176304	0.871546	0.971345	6159
Leaf formation	GO_0010338	16	0.322673	0.920111	0.971379	4410
Aromatic amino acid family metabolic process	GO_0009072	11	0.298116	0.791729	0.971414	7536
Glucose catabolic process	GO_0006007	13	0.586256	1.63679	0.971628	9148
Regulation of cell cycle	GO_0051726	23	0.261426	0.817918	0.97167	1111
Golgi to vacuole transport	GO_0006896	28	0.264056	0.891273	0.97174	7516
Regulation of reactive oxygen species metabolic process	GO_2000377	20	0.272487	0.930231	0.971745	9704
Assembly of large subunit precursor of preribosome	GO_1902626	10	0.357737	0.910082	0.971774	494
Transcription from rna polymerase iii promoter	GO_0006383	27	0.321781	0.903738	0.972167	15352
Deadenylation-dependent decapping of nuclear-transcribed mrna	GO_0000290	28	0.264859	0.878658	0.972191	13553
Cation transmembrane transport	GO_0098655	82	0.21915	0.891867	0.973222	15811
Lipid homeostasis	GO_0055088	29	0.350554	1.2402	0.973449	4461
Folic acid-containing compound biosynthetic process	GO_0009396	12	0.335827	0.871763	0.973538	10918
Lateral root development	GO_0048527	46	0.404067	1.35638	0.973582	2942
Rna 3 -end processing	GO_0031123	13	0.315148	0.772375	0.973738	19055
Malate transmembrane transport	GO_0071423	22	0.316121	0.879166	0.973845	8678
Rrna processing	GO_0006364	92	0.250747	0.769234	0.974014	9016
Protein import into chloroplast stroma	GO_0045037	19	0.318723	0.817964	0.974018	11945
Negative regulation of translation	GO_0017148	23	0.282327	0.904107	0.974341	11259
Regulation of photomorphogenesis	GO_0010099	16	0.292589	0.773338	0.974485	9096
Primary mirna processing	GO_0031053	19	0.267244	0.78178	0.974537	10555
Protein insertion into er membrane	GO_0045048	10	0.381127	0.930304	0.974627	9315
Cytoskeleton organization	GO_0007010	26	0.234437	0.777369	0.974653	13264
Phloem or xylem histogenesis	GO_0010087	43	0.277886	0.905202	0.974685	2482
Ribosome biogenesis	GO_0042254	73	0.231945	0.77016	0.974821	11539
Protein autophosphorylation	GO_0046777	204	0.200608	0.931458	0.975009	6037
Response to heat	GO_0009408	99	0.194934	0.785239	0.975445	7916
Chloroplast accumulation movement	GO_0009904	31	0.27799	0.745357	0.975556	5319
Response to starvation	GO_0042594	38	0.394123	1.36186	0.975578	9525
Shikimate metabolic process	GO_0019632	17	0.32227	0.782453	0.975792	11288
Phosphatidylinositol-mediated signaling	GO_0048015	12	0.262822	0.773927	0.975822	3755
Inflorescence development	GO_0010229	14	0.298846	0.818259	0.975861	2288
Chromosome organization	GO_0051276	16	0.257834	0.786323	0.975953	137
Vesicle docking	GO_0048278	46	0.197689	0.750941	0.975957	10409
Phosphatidylinositol-3-phosphate biosynthetic process	GO_0036092	27	0.274294	0.777821	0.976182	13710
Electron transport chain	GO_0022900	41	0.255418	0.879185	0.976537	10749
Vesicle-mediated transport	GO_0016192	251	0.171996	0.75194	0.976639	12085
Pseudouridine synthesis	GO_0001522	28	0.272929	0.743031	0.976721	6471
Protein import into peroxisome matrix	GO_0016558	15	0.282701	0.819064	0.976836	4826
Pectin biosynthetic process	GO_0045489	48	0.250526	0.77869	0.977047	8585
Transcription from rna polymerase i promoter	GO_0006360	29	0.294602	0.783023	0.977143	14535
Cutin transport	GO_0080051	29	0.404765	0.881332	0.977241	15710
Mitochondrial electron transport ubiquinol to cytochrome c	GO_0006122	14	0.30296	0.774339	0.977464	504
Isoleucine biosynthetic process	GO_0009097	11	0.325574	0.745498	0.977491	6355
Response to osmotic stress	GO_0006970	50	0.217936	0.752663	0.977668	10222
G-protein coupled receptor signaling pathway	GO_0007186	35	0.278136	0.931627	0.977695	9986
Mrna export from nucleus	GO_0006406	26	0.261049	0.740891	0.977807	8046
Stamen development	GO_0048443	37	0.422386	1.35855	0.978012	4498
Retrograde vesicle-mediated transport golgi to er	GO_0006890	51	0.239264	0.731589	0.978179	7581
Ethylene-activated signaling pathway	GO_0009873	23	0.382999	1.24525	0.978225	8793
Spliceosomal complex assembly	GO_0000245	34	0.284104	0.879589	0.978407	10526
Double-strand break repair via nonhomologous end joining	GO_0006303	10	0.261788	0.75316	0.97912	7370
Mitotic spindle assembly	GO_0090307	10	0.301188	0.725998	0.97935	13234
Regulation of peroxisome size	GO_0044375	15	0.430021	0.933411	0.979473	17825
Protein import into peroxisome matrix docking	GO_0016560	26	0.266383	0.745569	0.979502	7269
L-serine metabolic process	GO_0006563	23	0.269829	0.881424	0.979856	17113
Protein targeting	GO_0006605	15	0.447632	1.35224	0.979901	2707
Protein n-linked glycosylation via asparagine	GO_0018279	43	0.26102	0.731805	0.979978	1492
Response to cytokinin	GO_0009735	129	0.212811	0.932001	0.980001	13458
Fatty acid beta-oxidation	GO_0006635	53	0.248573	0.746511	0.980316	5927
Retrograde transport vesicle recycling within golgi	GO_0000301	15	0.355072	0.93418	0.98062	4267
Steroid biosynthetic process	GO_0006694	27	0.236796	0.75356	0.980632	11793
Aromatic amino acid family biosynthetic process	GO_0009073	41	0.355438	0.882325	0.98065	12254
Regulation of ph	GO_0006885	30	0.241583	0.723327	0.980819	8672
Nuclear-transcribed mrna catabolic process deadenylation-dependent decay	GO_0000288	41	0.317881	1.24671	0.981042	11640
Protein adp-ribosylation	GO_0006471	11	0.257075	0.696892	0.981216	7370
Positive regulation of histone acetylation	GO_0035066	12	0.260472	0.735546	0.981258	7290
Interphase microtubule nucleation by interphase microtubule organizing center	GO_0051415	10	0.301188	0.725998	0.981456	13234
Growth	GO_0040007	30	0.23823	0.69833	0.981604	11927
N-terminal peptidyl-glycine n-myristoylation	GO_0018008	10	0.297945	0.731982	0.98185	9980
Regulation of pentose-phosphate shunt	GO_0043456	15	0.337099	0.736358	0.982122	9613
Cellular biosynthetic process	GO_0044249	11	0.279878	0.727062	0.982129	12502
Signal transduction by protein phosphorylation	GO_0023014	117	0.212453	0.753894	0.982434	13625
Mitotic chromosome condensation	GO_0007076	14	0.256555	0.692373	0.982465	9586
Spliceosomal snrnp assembly	GO_0000387	24	0.275744	0.698998	0.982789	7920
Autophagosome assembly	GO_0000045	35	0.209988	0.73288	0.982827	4416
Xylem development	GO_0010089	14	0.280261	0.720259	0.982855	10648
Regulation of intracellular ph	GO_0051453	65	0.237003	0.75913	0.983425	6724
U4 snrna 3 -end processing	GO_0034475	13	0.340838	0.757614	0.983558	9998
Flower development	GO_0009908	86	0.230718	0.934189	0.983798	9185
Ion transport	GO_0006811	34	0.224253	0.692874	0.983901	7728
Regulation of shoot system development	GO_0048831	14	0.28362	0.699749	0.983904	12954
Pentose-phosphate shunt	GO_0006098	49	0.32407	1.23119	0.983906	6638
Hyperosmotic salinity response	GO_0042538	37	0.219724	0.754322	0.983931	7916
Regulation of catalytic activity	GO_0050790	63	0.215172	0.75572	0.984078	4789
Carbon fixation	GO_0015977	16	0.303389	0.759927	0.984254	6312
L-arginine import	GO_0043091	14	0.311487	0.702393	0.984795	5230
Centrosome duplication	GO_0051298	11	0.393462	0.934978	0.98483	10192
Regulation of meristem growth	GO_0010075	14	0.302229	0.707303	0.985138	1112
Protein import into mitochondrial outer membrane	GO_0045040	11	0.273334	0.703573	0.985462	17328
Seed germination	GO_0009845	59	0.334247	1.23507	0.985465	9131
Wax biosynthetic process	GO_0010025	70	0.199824	0.699917	0.985792	14240
Intra-golgi vesicle-mediated transport	GO_0006891	70	0.209524	0.687552	0.985797	7581
Exocyst assembly	GO_0001927	15	0.258581	0.760357	0.985842	9035
Adenine import across plasma membrane	GO_0098702	13	0.321686	0.707989	0.986429	17473
Ureide catabolic process	GO_0010136	11	0.354778	0.935517	0.986784	14940
Hexose transmembrane transport	GO_0035428	36	0.216924	0.70392	0.987119	16598
Vacuolar transport	GO_0007034	23	0.236593	0.714525	0.988265	2585
Uracil import across plasma membrane	GO_0098721	13	0.321686	0.707989	0.988514	17473
Long-day photoperiodism	GO_0048571	11	0.462934	1.24921	0.989051	10436
Positive regulation of proteasomal protein catabolic process	GO_1901800	34	0.291977	0.993843	0.989544	1358
Tryptophan biosynthetic process	GO_0000162	46	0.402606	1.24688	0.989588	14363
Dna ligation involved in dna repair	GO_0051103	15	0.245712	0.67269	0.989847	9008
Purine nucleobase catabolic process	GO_0006145	11	0.354778	0.935517	0.990019	14940
Cytoplasmic translational termination	GO_0002184	14	0.222644	0.662075	0.990443	13481
Hypoxanthine transport	GO_0035344	13	0.321686	0.707989	0.990609	17473
Post-translational protein modification	GO_0043687	18	0.269908	0.68151	0.990697	5791
System development	GO_0048731	19	0.238765	0.673485	0.991139	5789
Embryo development ending in seed dormancy	GO_0009793	222	0.233018	1.06584	0.991162	6115
Glycine metabolic process	GO_0006544	20	0.205602	0.65307	0.991254	17113
Fatty acid biosynthetic process	GO_0006633	235	0.263193	0.936178	0.991458	10274
Manganese ion transmembrane transport	GO_0071421	12	0.246439	0.710673	0.991467	10242
L-phenylalanine biosynthetic process	GO_0009094	14	0.243083	0.66658	0.991962	14524
Mannan catabolic process	GO_0046355	15	0.53071	1.23128	0.992206	6473
Golgi organization	GO_0007030	43	0.286743	0.994192	0.992255	11485
Regulation of membrane potential	GO_0042391	57	0.280296	0.937065	0.992414	6100
Reductive pentose-phosphate cycle	GO_0019253	14	0.249728	0.664074	0.992416	14235
Peptidyl-lysine monomethylation	GO_0018026	14	0.273188	0.662084	0.992439	6608
Sodium ion transmembrane transport	GO_0035725	34	0.215595	0.667984	0.992532	8418
Galactose metabolic process	GO_0006012	46	0.185278	0.657905	0.992609	13066
Guanine import across plasma membrane	GO_0098710	13	0.321686	0.707989	0.992712	17473
Cuticle development	GO_0042335	25	0.216817	0.675888	0.992749	12847
Inositol trisphosphate metabolic process	GO_0032957	16	0.230255	0.653567	0.992756	9724
De novo ctp biosynthetic process	GO_0044210	21	0.311167	0.655743	0.992828	8611
Nitrogen compound metabolic process	GO_0006807	35	0.311594	1.06672	0.993027	10297
Petal epidermis patterning	GO_0080172	18	0.314987	0.673516	0.99314	15710
Plastid translation	GO_0032544	12	0.28498	0.618726	0.993373	11662
Histone h3 deacetylation	GO_0070932	11	0.237955	0.616141	0.993462	19839
Regulation of auxin mediated signaling pathway	GO_0010928	12	0.240214	0.676912	0.993637	13011
Maturation of ssu-rrna from tricistronic rrna transcript	SSU-RRNA_5.8S_RRNA_LSU-RRNA_	68	0.219048	0.647627	0.994251	4187
Telomeric loop formation	GO_0031627	29	0.404887	1.34662	0.994462	14566
Arginine biosynthetic process	GO_0006526	18	0.268135	0.619743	0.994537	15598
Vesicle fusion	GO_0006906	85	0.161815	0.629466	0.994604	13056
Biotin biosynthetic process	GO_0009102	12	0.208835	0.631753	0.994615	16024
Peptidyl-histidine phosphorylation	GO_0018106	57	0.291597	0.938833	0.994916	6886
Long-chain fatty-acyl-coa metabolic process	GO_0035336	15	0.268912	0.621574	0.994984	5635
Nuclear-transcribed mrna catabolic process nonsense-mediated decay	GO_0000184	21	0.325001	0.937346	0.994991	12278
Pentose-phosphate shunt non-oxidative branch	GO_0009052	22	0.401467	1.06758	0.995073	16706
Rna modification	GO_0009451	19	0.226296	0.644463	0.995157	8487
Nad transport	GO_0043132	12	0.477007	1.25009	0.995192	2063
Arp2/3 complex-mediated actin nucleation	GO_0034314	16	0.327818	0.994339	0.995558	7584
Cellular response to stimulus	GO_0051716	16	0.244741	0.633058	0.995593	523
Phosphorelay signal transduction system	GO_0000160	150	0.246635	1.0796	0.996034	6061
Mrna splicing via spliceosome	GO_0000398	153	0.169193	0.622677	0.996152	14075
Phosphate-containing compound metabolic process	GO_0006796	21	0.197519	0.62509	0.996203	5945
Autophagy of mitochondrion	GO_0000422	31	0.245061	0.641065	0.996348	7389
Phosphatidylinositol phosphorylation	GO_0046854	76	0.271956	1.07798	0.996362	4129
Dna mediated transformation	GO_0009294	13	0.268735	0.638668	0.996662	9052
Animal organ senescence	GO_0010260	18	0.243826	0.633859	0.996881	17275
Cellular lipid metabolic process	GO_0044255	22	0.304648	1.02743	0.99704	11979
Organophosphate ester transport	GO_0015748	31	0.310844	0.939125	0.997513	11230
Glutamate biosynthetic process	GO_0006537	12	0.190723	0.397226	0.997645	15039
L-phenylalanine catabolic process	GO_0006559	36	0.17674	0.436405	0.997686	16346
Cellular response to oxidative stress	GO_0034599	64	0.155924	0.607928	0.99778	11326
Glycogen metabolic process	GO_0005977	13	0.172874	0.446533	0.998183	38676
Regulation of stomatal movement	GO_0010119	54	0.287382	0.994723	0.99827	5555
Dna-templated transcription initiation	GO_0006352	41	0.193695	0.634461	0.998359	8974
Response to cold	GO_0009409	75	0.316379	1.22556	0.998601	10565
Cell morphogenesis	GO_0000902	31	0.116338	0.407472	0.998686	16339
Atp synthesis coupled electron transport	GO_0042773	18	0.173492	0.453425	0.998966	38648
Zinc ii ion transmembrane transport	GO_0071577	47	0.434837	1.64727	0.998967	6169
Telomere maintenance	GO_0000723	10	0.202019	0.460814	0.99965	3374
Acetyl-coa biosynthetic process from pyruvate	GO_0006086	11	0.288078	0.602441	0.999662	10765
Nitrate assimilation	GO_0042128	11	0.249851	0.584835	0.9997	15950
Carbohydrate transport	GO_0008643	124	0.253495	1.06758	0.99988	5802
Fruit ripening	GO_0009835	20	0.445798	1.25115	0.999894	3036
Regulation of sequestering of zinc ion	GO_0061088	24	0.610096	1.76608	1	6169
Protein localization to cilium	GO_0061512	43	0.43247	1.66831	1	2583
Thiamine biosynthetic process	GO_0009228	29	0.559624	1.65904	1	8301
Trna aminoacylation for mitochondrial protein translation	GO_0070127	12	0.574049	1.65766	1	7852
Glycogen catabolic process	GO_0005980	16	0.618391	1.65615	1	8696
Regulation of phosphoprotein phosphatase activity	GO_0034047	52	0.329179	1.32958	1	4519
Galactose catabolic process	GO_0019388	10	0.551334	1.32921	1	92
Carotenoid biosynthetic process	GO_0016117	48	0.487699	1.32859	1	8838
Psii associated light-harvesting complex ii catabolic process	GO_0010304	17	0.465751	1.32176	1	4167
Protein ubiquitination involved in ubiquitin-dependent protein catabolic process	GO_0042787	176	0.294246	1.31974	1	8296
Dna replication	GO_0006260	48	0.390106	1.31637	1	6785
Salicylic acid mediated signaling pathway	GO_0009863	19	0.400632	1.31295	1	11734
Guanosine tetraphosphate metabolic process	GO_0015969	12	0.545803	1.31238	1	14251
Positive regulation of catalytic activity	GO_0043085	28	0.352392	1.30926	1	5645
Protein retention in golgi apparatus	GO_0045053	12	0.527847	1.30587	1	105
Rna-directed dna methylation	GO_0080188	16	0.465401	1.30224	1	4582
Starch metabolic process	GO_0005982	18	0.485973	1.29813	1	3609
Unsaturated fatty acid biosynthetic process	GO_0006636	15	0.432287	1.29658	1	10566
Protein neddylation	GO_0045116	38	0.353278	1.29317	1	2508
Cotyledon vascular tissue pattern formation	GO_0010588	19	0.513393	1.29116	1	14627
Pyridoxal phosphate biosynthetic process	GO_0042823	15	0.481569	1.28814	1	10205
Phosphatidylethanolamine biosynthetic process	GO_0006646	11	0.531964	1.28504	1	7875
Xenobiotic transport	GO_0042908	53	0.364736	1.28425	1	4498
Cellular aldehyde metabolic process	GO_0006081	22	0.405105	1.28327	1	4870
Positive gravitropism	GO_0009958	54	0.412087	1.28068	1	13251
Regulation of proton transport	GO_0010155	27	0.403963	1.27923	1	6852
Protein deubiquitination	GO_0016579	99	0.313635	1.27913	1	5358
Cellular amino acid biosynthetic process	GO_0008652	23	0.420483	1.27713	1	9081
Protein methylation	GO_0006479	11	0.495147	1.27077	1	410
Isopentenyl diphosphate biosynthetic process methylerythritol 4-phosphate pathway	GO_0019288	22	0.552996	1.26996	1	6452
Protein folding in endoplasmic reticulum	GO_0034975	12	0.516754	1.26305	1	2634
Flavonol biosynthetic process	GO_0051555	14	0.463558	1.26097	1	6136
Poly	A+_MRNA_EXPORT_FROM_NUCLEUS_	17	0.43512	1.26073	1	8070
Leaf shaping	GO_0010358	12	0.472295	1.25956	1	4410
Drug transmembrane transport	GO_0006855	145	0.303986	1.25883	1	6647
Polyamine transmembrane transport	GO_1902047	11	0.47357	1.2588	1	7270
Negative regulation of seed germination	GO_0010187	15	0.454244	1.25792	1	6
Embryo development	GO_0009790	14	0.497199	1.25523	1	10094
Cell adhesion	GO_0007155	11	0.479486	1.25468	1	8110
Response to salt stress	GO_0009651	181	0.257996	1.25461	1	14688
Cold acclimation	GO_0009631	22	0.408987	1.25392	1	1734
Ubiquitin-dependent glycoprotein erad pathway	GO_0097466	13	0.424779	1.25319	1	6174
Protein polyubiquitination	GO_0000209	143	0.274524	1.22247	1	8296
Post-embryonic development	GO_0009791	43	0.294034	1.20696	1	6992
Scf-dependent proteasomal ubiquitin-dependent protein catabolic process	GO_0031146	35	0.352641	1.20666	1	12810
Immune response	GO_0006955	11	0.514079	1.20512	1	3053
Carpel development	GO_0048440	11	0.43593	1.20497	1	4410
Ubiquitin-dependent protein catabolic process	GO_0006511	230	0.246676	1.1997	1	9676
Gluconeogenesis	GO_0006094	48	0.306868	1.1994	1	9613
Protein repair	GO_0030091	12	0.448598	1.19659	1	10541
Temperature compensation of the circadian clock	GO_0010378	16	0.539629	1.19061	1	10420
Cytokinesis	GO_0000910	28	0.383409	1.18924	1	9167
Pollen development	GO_0009555	109	0.280557	1.18762	1	5469
Vegetative phase change	GO_0010050	12	0.469125	1.18661	1	9722
Glyoxylate cycle	GO_0006097	22	0.409669	1.18262	1	1892
Anatomical structure morphogenesis	GO_0009653	10	0.471573	1.18177	1	6579
Chlorophyll catabolic process	GO_0015996	22	0.451391	1.18008	1	13772
Prolyl-trna aminoacylation	GO_0006433	11	0.477453	1.17647	1	3851
Negative regulation of anion channel activity by blue light	GO_0010362	16	0.517037	1.17335	1	5319
Positive regulation of transcription from rna polymerase ii promoter	GO_0045944	86	0.308985	1.17173	1	2342
Regulation of cellular metabolic process	GO_0031323	12	0.41085	1.171	1	5706
Flavonoid glucuronidation	GO_0052696	124	0.27678	1.17068	1	11508
Sucrose transport	GO_0015770	14	0.490927	1.16794	1	2647
Single-organism cellular process	GO_0044763	64	0.294559	1.16407	1	6227
Ethylene biosynthetic process	GO_0009693	18	0.463792	1.16404	1	4653
Potassium ion transmembrane transport	GO_0071805	156	0.283554	1.16067	1	9608
Protein localization to organelle	GO_0033365	19	0.452018	1.15783	1	11882
Mrna cis splicing via spliceosome	GO_0045292	13	0.420635	1.15576	1	10095
Response to uv	GO_0009411	10	0.403909	1.15472	1	7432
Floral organ abscission	GO_0010227	10	0.431389	1.15462	1	3313
Stem vascular tissue pattern formation	GO_0010222	16	0.532447	1.15445	1	14627
Regulation of cell shape	GO_0008360	116	0.258357	1.15202	1	9017
Starch catabolic process	GO_0005983	24	0.352874	1.14997	1	8751
Rna phosphodiester bond hydrolysis	GO_0090501	24	0.394803	1.14977	1	5649
Zinc ii ion transport	GO_0006829	10	0.549041	1.14936	1	7925
Mismatch repair	GO_0006298	19	0.439083	1.14838	1	2485
Response to water deprivation	GO_0009414	135	0.25296	1.14773	1	7532
Phyllome development	GO_0048827	15	0.379333	1.14005	1	8803
Phototropism	GO_0009638	34	0.385562	1.13904	1	6451
Positive regulation of long-day photoperiodism flowering	GO_0048578	18	0.491083	1.13828	1	10420
Peroxisome organization	GO_0007031	10	0.434134	1.13633	1	3039
Udp-glucose transport	GO_0015786	31	0.38137	1.12928	1	3877
Iron-sulfur cluster assembly	GO_0016226	46	0.298589	1.12906	1	10784
Transcription from plastid promoter	GO_0042793	11	0.481849	1.12846	1	8302
Mitochondrial translational elongation	GO_0070125	17	0.451198	1.12788	1	18596
N-terminal peptidyl-methionine acetylation	GO_0017196	11	0.461701	1.1253	1	1671
	1-3-BETA-D-GLUCAN_BIOSYNTHETIC_PROCESS_	50	0.325199	1.12512	1	4183
Positive regulation of ubiquitin-protein transferase activity	GO_0051443	14	0.402218	1.12358	1	2508
Negative regulation of cellular process	GO_0048523	10	0.416505	1.1234	1	5706
Cellular iron ion homeostasis	GO_0006879	14	0.399755	1.12249	1	340
Cytokinin metabolic process	GO_0009690	11	0.433662	1.12135	1	13712
Magnesium ion transport	GO_0015693	51	0.336468	1.12126	1	8868
Polar nucleus fusion	GO_0010197	22	0.34707	1.11547	1	6471
Pollen maturation	GO_0010152	12	0.377217	1.11543	1	10912
Intracellular signal transduction	GO_0035556	316	0.228545	1.11527	1	13933
Endocytosis	GO_0006897	150	0.238126	1.11368	1	9138
L-alpha-amino acid transmembrane transport	GO_1902475	10	0.437884	1.11337	1	6867
Proteasome assembly	GO_0043248	33	0.316424	1.11174	1	6491
Resolution of recombination intermediates	GO_0071139	10	0.422845	1.10997	1	12737
Anthocyanin accumulation in tissues in response to uv light	GO_0043481	21	0.430891	1.10919	1	4498
Leaf vascular tissue pattern formation	GO_0010305	20	0.312439	1.10904	1	4410
Response to gibberellin	GO_0009739	28	0.330382	1.10787	1	7223
Defense response by callose deposition in cell wall	GO_0052544	20	0.349435	1.10277	1	13755
Anaerobic respiration	GO_0009061	12	0.542363	1.10204	1	3936
Detection of hypoxia	GO_0070483	12	0.542363	1.10204	1	3936
Peptidyl-cysteine oxidation	GO_0018171	12	0.542363	1.10204	1	3936
Cytokinin-activated signaling pathway	GO_0009736	28	0.325865	1.10185	1	12463
Valyl-trna aminoacylation	GO_0006438	21	0.388784	1.1002	1	6353
Pollen tube growth	GO_0009860	31	0.296457	1.09884	1	2840
Root hair elongation	GO_0048767	22	0.338252	1.09826	1	13251
Photoinhibition	GO_0010205	15	0.357756	1.0967	1	4821
Regulation of circadian rhythm	GO_0042752	16	0.388441	1.09621	1	5253
Mitochondrial electron transport nadh to ubiquinone	GO_0006120	14	0.389064	1.09369	1	11107
Magnesium ion transmembrane transport	GO_1903830	50	0.3371	1.09351	1	8868
Regulation of anion transmembrane transport	GO_1903959	58	0.28319	1.0926	1	11309
Nad biosynthetic process	GO_0009435	13	0.402278	1.09239	1	12872
Glycolytic process through fructose-6-phosphate	GO_0061615	33	0.331742	1.0905	1	10629
Protein dephosphorylation	GO_0006470	383	0.222606	1.09041	1	9645
Response to hydrogen peroxide	GO_0042542	36	0.371217	1.08805	1	7491
Petal development	GO_0048441	12	0.456263	1.08455	1	8450
Negative regulation of defense response	GO_0031348	17	0.360713	1.08434	1	15652
Regulation of gene expression	GO_0010468	56	0.311389	1.08265	1	12369
Chorismate metabolic process	GO_0046417	12	0.510022	1.0816	1	16810
Rna phosphodiester bond hydrolysis exonucleolytic	GO_0090503	58	0.311899	1.08099	1	11267
Response to uv-b	GO_0010224	33	0.311123	1.07977	1	4354
Positive regulation of transcription elongation from rna polymerase ii promoter	GO_0032968	10	0.371925	1.07459	1	4392
Dephosphorylation	GO_0016311	239	0.230815	1.06974	1	9194
Mitochondrial respiratory chain complex iv assembly	GO_0033617	13	0.425915	1.06917	1	5938
Protein import into mitochondrial matrix	GO_0030150	31	0.338913	1.06858	1	5359
D-ribose metabolic process	GO_0006014	20	0.389158	1.06775	1	7074
Root development	GO_0048364	103	0.258314	1.05513	1	8126
Nucleotide phosphorylation	GO_0046939	33	0.35065	1.05477	1	2173
Response to bacterium	GO_0009617	20	0.336403	1.05343	1	6452
Protein retention in er lumen	GO_0006621	11	0.452346	1.05255	1	8771
Response to abscisic acid	GO_0009737	189	0.213094	1.05236	1	7237
Cellular potassium ion homeostasis	GO_0030007	10	0.407532	1.05013	1	1420
Response to external stimulus	GO_0009605	13	0.391691	1.04835	1	2217
Regulation of stomatal opening	GO_1902456	10	0.409023	1.04794	1	9704
Regulation of root meristem growth	GO_0010082	15	0.334475	1.04374	1	6582
Fruit development	GO_0010154	22	0.361344	1.04341	1	15208
Plastid organization	GO_0009657	11	0.356153	1.04289	1	8706
Anthocyanin-containing compound biosynthetic process	GO_0009718	15	0.355155	1.03936	1	6537
Transcription initiation from rna polymerase ii promoter	GO_0006367	25	0.300982	1.03823	1	11318
Response to virus	GO_0009615	14	0.364041	1.03789	1	4807
Carbohydrate transmembrane transport	GO_0034219	39	0.399371	1.03651	1	14366
Rrna methylation	GO_0031167	15	0.416939	1.03575	1	13089
Membrane protein proteolysis	GO_0033619	22	0.331982	1.03527	1	14741
Regulation of flower development	GO_0009909	60	0.274992	1.03338	1	2334
Lateral root formation	GO_0010311	34	0.28083	1.03285	1	3945
Chromatin silencing	GO_0006342	25	0.338227	1.03135	1	12628
Protein peptidyl-prolyl isomerization	GO_0000413	119	0.275196	1.03044	1	5441
Ubiquitin-dependent erad pathway	GO_0030433	73	0.266096	1.02938	1	6944
Transport	GO_0006810	372	0.2053	1.02787	1	12305
Meristem structural organization	GO_0009933	18	0.309033	1.0275	1	4410
Endoplasmic reticulum organization	GO_0007029	13	0.430596	1.02392	1	11485
Flavonoid biosynthetic process	GO_0009813	149	0.241911	1.0233	1	10931
Glucose 6-phosphate metabolic process	GO_0051156	21	0.310855	1.02163	1	6834
Stomatal movement	GO_0010118	19	0.330271	1.0205	1	12349
Cell cycle	GO_0007049	29	0.325233	1.01722	1	2965
Riboflavin biosynthetic process	GO_0009231	21	0.333336	1.01681	1	9224
Positive regulation of phosphorylation of rna polymerase ii c-terminal domain	GO_1901409	21	0.358653	1.01516	1	7473
Positive regulation of rna polymerase ii transcriptional preinitiation complex assembly	GO_0045899	40	0.28864	1.01456	1	6944
Arginyl-trna aminoacylation	GO_0006420	10	0.46194	1.01304	1	2717
Negative regulation of nucleic acid-templated transcription	GO_1903507	29	0.316446	1.01152	1	8552
N-glycan processing	GO_0006491	32	0.291126	1.01014	1	6174
Jasmonic acid mediated signaling pathway	GO_0009867	28	0.284039	1.00792	1	8828
Positive regulation of cyclin-dependent protein serine/threonine kinase activity	GO_0045737	22	0.349576	1.00738	1	7473
Oligosaccharide metabolic process	GO_0009311	13	0.378781	1.00533	1	1492
Nucleotide-sugar transport	GO_0015780	24	0.360791	1.00178	1	16043
Red far-red light phototransduction	GO_0009585	35	0.286414	1.00005	1	2520
Xanthine catabolic process	GO_0009115	13	0.408439	0.999482	1	11694
Fructose 6-phosphate metabolic process	GO_0006002	38	0.326104	0.998987	1	10629
Blue light signaling pathway	GO_0009785	38	0.360234	0.997995	1	8588
Atp biosynthetic process	GO_0006754	52	0.295643	0.997485	1	6724
Negative regulation of ethylene-activated signaling pathway	GO_0010105	48	0.326487	0.995595	1	6886
Nuclear-transcribed mrna catabolic process exonucleolytic 3 -5	GO_0034427	15	0.420274	0.995087	1	9998
Peptidyl-tyrosine phosphorylation	GO_0018108	141	0.236861	0.987521	1	4666
Regulation of cell size	GO_0008361	26	0.348229	0.985841	1	4498
Protein glycosylation	GO_0006486	78	0.22566	0.979761	1	13650
Regulation of mitotic metaphase/anaphase transition	GO_0030071	10	0.413926	0.978247	1	13143
Coenzyme a biosynthetic process	GO_0015937	14	0.342416	0.977695	1	11056
Rrna catabolic process	GO_0016075	12	0.398862	0.976387	1	168
Cellular response to nitrogen levels	GO_0043562	13	0.39412	0.975246	1	5872
Dna recombination	GO_0006310	37	0.312507	0.974888	1	6116
Negative regulation of gibberellic acid mediated signaling pathway	GO_0009938	12	0.336978	0.973386	1	3326
Deadenylation-independent decapping of nuclear-transcribed mrna	GO_0031087	18	0.320439	0.973378	1	8637
Oligopeptide transport	GO_0006857	67	0.258507	0.972931	1	8996
Amino acid import	GO_0043090	10	0.433887	0.970754	1	8519
Ionotropic glutamate receptor signaling pathway	GO_0035235	24	0.359999	0.970727	1	9730
Phenylpropanoid biosynthetic process	GO_0009699	22	0.378759	0.969559	1	3637
Cytokinesis by cell plate formation	GO_0000911	24	0.333056	0.967267	1	6755
Cell division	GO_0051301	129	0.222347	0.966571	1	8793
Protein targeting to vacuole	GO_0006623	68	0.247673	0.966182	1	6115
Fatty acid transport	GO_0015908	11	0.517703	0.964494	1	14627
Protein targeting to golgi	GO_0000042	10	0.376928	0.963056	1	545
Seed coat development	GO_0010214	19	0.333397	0.959965	1	9759
Autophagy of nucleus	GO_0044804	30	0.316036	0.958279	1	7389
Regulation of protein serine/threonine phosphatase activity	GO_0080163	46	0.282858	0.957888	1	6020
Peptidyl-proline hydroxylation	GO_0019511	12	0.393662	0.956874	1	6843
Viral replication complex formation and maintenance	GO_0046786	12	0.368252	0.955146	1	1602
Leaf development	GO_0048366	69	0.241441	0.9529	1	9920
Cell tip growth	GO_0009932	14	0.344203	0.952317	1	8674
Amp biosynthetic process	GO_0006167	11	0.344441	0.950553	1	10122
Udp-n-acetylglucosamine biosynthetic process	GO_0006048	15	0.372812	0.949068	1	10014
Glucosylceramide catabolic process	GO_0006680	16	0.345385	0.946747	1	5737
Glycosaminoglycan biosynthetic process	GO_0006024	13	0.343751	0.945538	1	11019
Protein localization to pre-autophagosomal structure	GO_0034497	19	0.321049	0.944392	1	7389
Microtubule cytoskeleton organization	GO_0000226	40	0.307367	0.943677	1	9167
Chromatin remodeling	GO_0006338	36	0.258118	0.943331	1	7290
Histone ubiquitination	GO_0016574	13	0.354144	0.94063	1	3725
Rna processing	GO_0006396	133	0.255167	0.940331	1	3988
Induced systemic resistance jasmonic acid mediated signaling pathway	GO_0009864	13	0.428389	0.940166	1	10265
Chorismate biosynthetic process	GO_0009423	23	0.434673	0.939395	1	11772
Organic phosphonate transport	GO_0015716	31	0.310844	0.939125	1	11230
Rrna base methylation	GO_0070475	14	0.218639	0.597619	1	12898
Anion transmembrane transport	GO_0098656	29	0.195228	0.591255	1	14426
Ammonium transmembrane transport	GO_0072488	12	0.224573	0.589547	1	6166
Calcium ion homeostasis	GO_0055074	19	0.255193	0.585823	1	6420
Regulation of protein kinase activity	GO_0045859	38	0.205838	0.585498	1	6017
Ribosomal small subunit assembly	GO_0000028	50	0.226321	0.57794	1	7267
Isocitrate metabolic process	GO_0006102	11	0.261163	0.576833	1	15247
Trehalose biosynthetic process	GO_0005992	44	0.17346	0.571084	1	5897
Trna splicing via endonucleolytic cleavage and ligation	GO_0006388	10	0.242881	0.561331	1	5413
Ammonia assimilation cycle	GO_0019676	17	0.203735	0.55794	1	15039
Phospholipid biosynthetic process	GO_0008654	14	0.210473	0.55346	1	10657
Protein homooligomerization	GO_0051260	13	0.181828	0.551841	1	8801
Lysyl-trna aminoacylation	GO_0006430	18	0.201793	0.54883	1	7361
Auxin influx	GO_0060919	10	0.247334	0.544637	1	12334
Cinnamic acid biosynthetic process	GO_0009800	23	0.260467	0.538416	1	21174
Vacuole organization	GO_0007033	49	0.178439	0.52711	1	12738
Respiratory electron transport chain	GO_0022904	11	0.223394	0.524811	1	36314
Maturation of lsu-rrna	GO_0000470	35	0.195372	0.52221	1	1803
De novo imp biosynthetic process	GO_0006189	16	0.205891	0.521946	1	1735
Trna processing	GO_0008033	30	0.190681	0.504145	1	6205
Misfolded or incompletely synthesized protein catabolic process	GO_0006515	20	0.207826	0.502717	1	11927
Meiotic cell cycle	GO_0007126	13	0.199931	0.493986	1	13234
Ribosomal large subunit assembly	GO_0000027	51	0.202369	0.491695	1	13164
Regulation of jasmonic acid mediated signaling pathway	GO_2000022	19	0.178351	0.489266	1	14009
Glycolipid biosynthetic process	GO_0009247	17	0.166161	0.488464	1	6048
Tetrahydrofolate interconversion	GO_0035999	26	0.145131	0.484689	1	17113
Lysine biosynthetic process via diaminopimelate	GO_0009089	16	0.205986	0.468801	1	15396
Seed maturation	GO_0010431	15	0.185666	0.46562	1	14466
Regulation of epidermal cell differentiation	GO_0045604	10	0.20384	0.465567	1	18494

## Sheet: KEGG Enrichment (floral tube)
No.	Pathway	Candidate genes with pathway annotation	All genes with pathway annotation	p-value	Q-value	Pathway ID
1	Photosynthesis - antenna proteins	4	19	0.000700486	0.0182126	ko00196
2	Photosynthesis	5	57	0.00837101	0.108823	ko00195
3	Phosphatidylinositol signaling system	2	9	0.0161263	0.139761	ko04070
4	Nucleotide excision repair	5	75	0.0252837	0.164344	ko03420
5	MAPK signaling pathway - plant	5	102	0.0769066	0.399914	ko04016
6	Sulfur relay system	1	5	0.10724	0.464708	ko04122
7	Plant-pathogen interaction	6	162	0.153298	0.567649	ko04626
8	Lysine degradation	1	9	0.18479	0.567649	ko00310
9	RNA degradation	4	104	0.203269	0.567649	ko03018
10	Metabolic pathways	8	258	0.218326	0.567649	ko01100
11	DNA replication	1	16	0.30483	0.640977	ko03030
12	Phagosome	5	164	0.305836	0.640977	ko04145
13	ABC transporters	1	17	0.320489	0.640977	ko02010
14	Protein processing in endoplasmic reticulum	8	307	0.38246	0.710282	ko04141
15	Ribosome biogenesis in eukaryotes	3	109	0.444758	0.761058	ko03008
16	Ribosome	10	426	0.490155	0.761058	ko03010
17	Spliceosome	9	384	0.497615	0.761058	ko03040
18	Mismatch repair	1	33	0.528501	0.76339	ko03430
19	mRNA surveillance pathway	5	223	0.567315	0.776326	ko03015
20	RNA polymerase	1	43	0.625118	0.812653	ko03020
21	Oxidative phosphorylation	3	149	0.657542	0.8141	ko00190
22	Plant hormone signal transduction	6	329	0.761509	0.899966	ko04075
23	Endocytosis	4	241	0.800636	0.905067	ko04144
24	Proteasome	1	85	0.85799	0.929489	ko03050
25	Circadian rhythm - plant	1	106	0.913005	0.943984	ko04712
26	RNA transport	4	326	0.943984	0.943984	ko03013
