# Supplementary material for: Comprehensive transcriptomic profiling reveals complex molecular mechanisms in the regulation of style-length dimorphism in Guettarda speciosa (Rubiaceae), a species with “anomalous” distyly
Source: Front Plant Sci. 2023 Mar 16;14:1116078. doi: 10.3389/fpls.2023.1116078 (PMC10060554; doi:10.3389/fpls.2023.1116078)
Supplement: Supplementary file 9 [file Table_4.xlsx]

## Sheet: phytohormone-related (style)
Unigene	Homologue	L1	L2	L3	S1	S2	S3	log2(L1/S1)	log2(L2/S2)	log2(L3/S3)	FDR (L1 vs.S1)	FDR (L2 vs.S2)	FDR (L3 vs.S3)
Gt_12638	BKI1	93.9607	116.086	23.4729	216.286	254.215	110.518	-1.20281	-1.13085	-2.23521	0.02	0.04	1.51e-05
Gt_65179	DWF4	34.5965	9.94847	0.495086	32.7569	37.4879	2.05625	0.0788248	-1.91388	-2.05426	0.9	0.03	0.01
Gt_53344	SAUR-AC1	134.692	253.51	270.705	8.59259	91.1021	121.201	3.97043	1.47648	1.15932	0.000267718	0.04	0.04
Gt_21495	EXPA8	853.865	1924.04	2806.47	7.98453	81.2936	200.971	6.74066	4.56485	3.8037	3.52e-06	5.54e-13	1.65e-09
Gt_67476	BZR1	46.8216	72.5394	30.8765	805.261	1241.89	693.754	-4.10421	-4.09763	-4.48984	0.03	0.01	0.03
Gt_6003	BAK1	882.984	1622.45	1404.64	844.405	1347.85	1239.55	0.0644528	0.267522	0.180385	1	0.9	0.9
Gt_30507	BSU1	96.9349	110.133	78.2623	137.693	136.869	134.381	-0.50637	-0.31354	-0.779937	0.67	0.89	0.44
Gt_78320	BRI1	570.306	710.762	369.622	527.447	851.419	749.323	0.11271	-0.260504	-1.01954	0.9	0.6	0.06
Gt_6838	LAX2	805.371	697.114	121.397	124.288	152.869	82.9529	2.69596	2.1891	0.549369	0.0038	0.000365366	0.68
Gt_15651	IAA7	248.483	1002.29	1829.38	0.380652	1.59789	4.55654	9.35046	9.29292	8.6492	3.4e-06	1.39e-23	5.09e-07
Gt_42656	ARF8	2330.82	2174.08	1569.25	593.856	505.616	275.396	1.97265	2.10429	2.51049	0.02	0.03	0.02
Gt_39798	ARF6	659.456	541.435	628.519	1025.4	984.197	954.531	-0.636842	-0.862159	-0.602837	0.56	0.6	0.84
Gt_33696	IAA26	27.5166	3.77982	0.817829	98.9224	43.4349	24.4713	-1.84599	-3.52246	-4.90315	0.00413843	0.03	0.01
Gt_15209	IAA13	144.276	227.529	161.382	75.5336	131.189	68.9983	0.933639	0.794401	1.22585	0.41	0.22	0.45
Gt_4260	GAI	1785.09	1412.14	1517.91	911.738	884.259	963.172	0.969309	0.675339	0.65622	0.11	0.41	0.35
Gt_14311	GA20OX3	113.327	273.747	222.213	155.449	344.535	192.3	-0.455941	-0.331807	0.208583	0.92	0.9	0.97
Gt_57928	GID1B	63.6427	65.7265	72.2394	144.295	164.927	155.968	-1.18095	-1.32728	-1.11039	0.79	0.67	0.72
Gt_30542	GAI1	1987.64	1587.79	1448.64	1093.18	1233.85	1153.13	0.862528	0.36386	0.32915	0.06	0.6	0.87
* Expression data were normalized counts through rlog transformation. Differential expression was considered significant if the FDR=<0.05, and log2FC>= 1 or log2FC =< -1

## Sheet: homologs of S-locus genes
Unigene	Homologue	L1	L2	L3	S1	S2	S3	Organ	log2(L1/S1)	log2(L2/S2)	log2(L3/S3)	FDR (L1 vs.S1)	FDR (L2 vs.S2)	FDR (L3 vs.S3)
Gt_37919	CYP734A50	485.351	177.929	192.46	500.579	216.006	170.669	style	-0.0445694	-0.279772	0.173359	0.99	0.81	0.96
Gt_8662	CYP734A1	18750.3	8172.2	1650.92	14429	8754.98	1622.57	style	0.377935	-0.0993805	0.0249895	0.84	0.98	0.99
Gt_47787	PumT	52.72	42.377	39.5195	58.1673	43.9782	61.7768	style	-0.141858	-0.053505	-0.644501	0.99	0.99	0.92
Gt_82132	KfbT	1700.06	189.765	609.798	1548.39	407.529	627.948	style	0.13481	-1.10269	-0.0423147	0.98	0.45	0.99
Gt_82445	GloT	0	0	0	0	0	0	style	N.A.	N.A.	N.A.	N.A.	N.A.	N.A.
Gt_82445	GloT	397.714	766.724	788.071	417.488	583.245	814.064	floral tube	-0.0700032	0.394605	-0.0468158	0.99	0.78	0.99
Gt_9693	TsBAHD	641.051	392.391	454.385	435.012	383.014	351.875	style	0.559385	0.0348953	0.368852	0.75	0.99	0.92
Gt_78869	S-ELF3	965.495	1097.96	1189.72	1049.28	965.857	1129.46	style	-0.120063	0.184942	0.0749894	0.97	0.95	0.99
* Expression data were normalized counts through rlog transformation. Differential expression was considered significant if the FDR=<0.05, and log2FC>= 1 or log2FC =< -1
