# Supplementary material for: Comprehensive transcriptomic profiling reveals complex molecular mechanisms in the regulation of style-length dimorphism in Guettarda speciosa (Rubiaceae), a species with “anomalous” distyly
Source: Front Plant Sci. 2023 Mar 16;14:1116078. doi: 10.3389/fpls.2023.1116078 (PMC10060554; doi:10.3389/fpls.2023.1116078)
Supplement: Supplementary file 10 [file Table_5.xlsx]

## Sheet: ClueGO Results
ID	Term	Sig. Level (FDR)	Nr. Genes
GO:0009755	Hormone-mediated signaling pathway	< 0.001	94
GO:0009725	Response to hormone	< 0.001	213
GO:0048437	Floral organ development	< 0.001	33
GO:0048367	Shoot system development	< 0.001	140
GO:0031323	Regulation of cellular metabolic process	< 0.001	117
GO:0044723	Single-organism carbohydrate metabolic process	< 0.001	60
GO:0055085	Transmembrane transport	< 0.001	125
GO:0048509	regulation of meristem development	< 0.001	12
GO:0006629	Lipid metabolic process	< 0.001	123
GO:0099402	Plant organ development	< 0.001	171
GO:0070887	Cellular response to chemical stimulus	< 0.001	179
GO:0044255	Cellular lipid metabolic process	< 0.01	101
GO:0007275	Multicellular organism development	< 0.01	320
GO:0098660	Inorganic ion transmembrane transport	< 0.01	58
GO:0006412	Translation	< 0.01	20
GO:0048731	System development	< 0.01	272
GO:0009908	Flower development	< 0.01	66
GO:0006793	Phosphorus metabolic process	< 0.01	160
GO:0044262	Cellular carbohydrate metabolic process	< 0.01	60
GO:0005975	Carbohydrate metabolic process	< 0.01	100
GO:0044264	Cellular polysaccharide metabolic process	< 0.01	45
GO:0006796	Phosphate-containing compound metabolic process	< 0.01	156
GO:0015075	Ion transmembrane transporter activity	< 0.01	68
GO:0006468	Protein phosphorylation	< 0.01	103
GO:0090698	Post-embryonic plant morphogenesis	< 0.01	31
GO:0015318	Inorganic molecular entity transmembrane transporter activity	< 0.01	60
GO:0006952	Defense response	< 0.01	190
GO:0098662	Inorganic cation transmembrane transport	< 0.01	46
GO:0098655	Cation transmembrane transport	< 0.01	51
GO:1901701	Cellular response to oxygen-containing compound	< 0.01	110
GO:0005976	Polysaccharide metabolic process	< 0.01	55
GO:0048827	Phyllome development	< 0.01	77
GO:0071310	Cellular response to organic substance	< 0.01	137
GO:0008610	Lipid biosynthetic process	< 0.01	77
GO:0043604	Amide biosynthetic process	< 0.01	28
GO:0009791	Post-embryonic development	< 0.01	184
